1 **Highly efficient SARS-CoV-2 infection of human cardiomyocytes: spike protein-mediated cell**  
2 **fusion and its inhibition**

3

4 Chanakha K. Navaratnarajah<sup>1†</sup>, David R. Pease<sup>2†</sup>, Peter Halfmann<sup>3</sup>, Biruhalem Taye<sup>1</sup>, Alison  
5 Barkhymer<sup>1</sup>, Kyle G. Howell<sup>4</sup>, Jon E. Charlesworth<sup>4</sup>, Trace A. Christensen<sup>4</sup>, Yoshihiro Kawaoka<sup>3,5</sup>,  
6 Roberto Cattaneo<sup>1\*</sup>, Jay W. Schneider<sup>2\*</sup> and Wanek Family Program for HLHS-Stem Cell  
7 Pipeline<sup>^</sup>

8

9 <sup>1</sup>Department of Molecular Medicine, Mayo Clinic, Rochester, MN 55905, USA.

10 <sup>2</sup>Discovery Engine/Program for Hypoplastic Left Heart Syndrome, Mayo Clinic, Rochester, MN  
11 55905, USA.

12 <sup>3</sup>Influenza Research Institute, Department of Pathobiological Sciences, School of Veterinary  
13 Medicine, University of Wisconsin-Madison, Madison, WI 53711, USA.

14 <sup>4</sup>Mayo Microscopy and Cell Analysis Core, Mayo Clinic, Rochester, MN 55905, USA.

15 <sup>5</sup>Division of Virology, Department of Microbiology and Immunology, Institute of Medical  
16 Science, University of Tokyo, 108-8639 Tokyo, Japan.

17 † These authors contributed equally to this work.

18 \*Corresponding authors.

19 Emails: [roberto.cattaneo@mayo.edu](mailto:roberto.cattaneo@mayo.edu) (R.C.) and [schneider.jay1@mayo.edu](mailto:schneider.jay1@mayo.edu) (J.W.S.)

20 <sup>^</sup> Membership of the Wanek Family Program for HLHS-Stem Cell Pipeline is provided in the  
21 Acknowledgments.

## 22 Abstract

23

24 Severe cardiovascular complications can occur in coronavirus disease of 2019 (COVID-19)  
25 patients. Cardiac damage is attributed mostly to a bystander effect: the aberrant host response  
26 to acute respiratory infection. However, direct infection of cardiac tissue by severe acute  
27 respiratory syndrome coronavirus 2 (SARS-CoV-2) also occurs. We examined here the cardiac  
28 tropism of SARS-CoV-2 in human induced pluripotent stem cell-derived cardiomyocytes (hiPSC-  
29 CM) that beat spontaneously. These cardiomyocytes express the angiotensin I converting-  
30 enzyme 2 (ACE2) receptor and a subset of the proteases that mediate spike protein cleavage in  
31 the lungs, but not transmembrane protease serine 2 (TMPRSS2). Nevertheless, SARS-CoV-2  
32 infection was productive: viral transcripts accounted for about 88% of total mRNA. In the  
33 cytoplasm of infected hiPSC-CM, smooth walled exocytic vesicles contained numerous 65-90  
34 nm particles with typical ribonucleocapsid structures, and virus-like particles with knob-like  
35 spikes covered the cell surface. To better understand the mechanisms of SARS-CoV-2 spread in  
36 hiPSC-CM we engineered an expression vector coding for the spike protein with a monomeric  
37 emerald-green fluorescent protein fused to its cytoplasmic tail (S-mEm). Proteolytic processing  
38 of S-mEm and the parental spike were equivalent. Live cell imaging tracked spread of S-mEm  
39 signal from cell to cell and documented formation of syncytia. A cell-permeable, peptide-based  
40 molecule that blocks the catalytic site of furin abolished cell fusion. A spike mutant with the  
41 single amino acid change R682S that inactivates the furin cleavage site was fusion inactive.  
42 Thus, SARS-CoV-2 can replicate efficiently in hiPSC-CM and furin activation of its spike protein is  
43 required for fusion-based cytopathology. This hiPSC-CM platform provides an opportunity for  
44 target-based drug discovery in cardiac COVID-19.

## 45 Author Summary

46 It is unclear whether the cardiac complications frequently observed in COVID-19 patients are  
47 due exclusively to systemic inflammation and thrombosis. Viral replication has occasionally  
48 been confirmed in cardiac tissue, but rigorous analyses are restricted to rare autopsy materials.  
49 Moreover, there are few animal models to study cardiovascular complications of coronavirus  
50 infections. To overcome these limitations, we developed an *in vitro* model of SARS-CoV-2  
51 spread in induced pluripotent stem cell-derived cardiomyocytes. In these cells, infection is  
52 highly productive: viral transcription levels exceed those documented in permissive  
53 transformed cell lines. To better understand the mechanisms of SARS-CoV-2 spread we  
54 expressed a fluorescent version of its spike protein that allowed to characterize a fusion-based  
55 cytopathic effect. A mutant of the spike protein with a single amino acid mutation in the furin  
56 cleavage site lost cytopathic function. The spike protein of the Middle East Respiratory  
57 Syndrome (MERS) coronavirus drove cardiomyocyte fusion with slow kinetics, whereas the  
58 spike proteins of SARS-CoV and the respiratory coronavirus 229E were inactive. These fusion  
59 activities correlated with the level of cardiovascular complications observed in infections with  
60 the respective viruses. These data indicate that SARS-CoV-2 has the potential to cause cardiac  
61 damage by fusing cardiomyocytes.

62

63

## 64 Introduction

65 Severe acute respiratory syndrome coronavirus 2 (SARS-CoV-2), the coronavirus family member  
66 that most recently adapted to humans, is the etiologic agent of the coronavirus disease of 2019  
67 (COVID-19). While the four coronaviruses endemic to humans (229E, NL63, OC43 and HKU1)  
68 impact mainly the respiratory tract and usually cause mild symptoms, SARS-CoV-2, as the other  
69 emerging coronaviruses SARS-CoV and Middle East Respiratory Syndrome (MERS), can cause  
70 lethal systemic symptoms [1].

71 Systemic symptoms caused by the three emerging coronaviruses include cardiovascular  
72 complications. In particular, SARS-CoV-2 infection causes myocardial disease in a significant  
73 fraction of COVID-19 patients [2]. Complications include worsening of pre-existing conditions  
74 and the onset of new disorders [3-5]. New disorders range from myocardial injury with or  
75 without classic coronary occlusion to arrhythmias and heart failure [3, 6].

76 Many cardiac symptoms have been tentatively attributed to aberrant host responses to acute  
77 respiratory infection [7, 8], but the complex mechanisms of cardiac disease are incompletely  
78 understood. As SARS-CoV-2 nucleic acids and proteins have been occasionally detected in  
79 cardiac tissue [9-17], productive SARS-CoV-2 infection of cardiomyocytes may directly cause  
80 disease. However, this hypothesis is difficult to verify experimentally. Rigorous analyses of  
81 cardiac tissue are restricted to rare autopsy materials, and there are few animal models to  
82 study cardiovascular complications of any coronavirus infection [1, 18].

83 To overcome these limitations, human induced pluripotent stem cell-derived cardiomyocytes  
84 (hiPSC-CM) have been used to model SARS-CoV-2 spread in cardiac tissue [19-23]. Focusing on

85 hiPSC-CM from a developmental stage with peak expression of the SARS-CoV-2 receptor,  
86 angiotensin I converting-enzyme 2 (ACE2), we have established a new model of SARS-CoV-2  
87 infection. In this model SARS-CoV-2 replicates more efficiently than in the hiPSC-CM models  
88 previously used. Electron microscopy analyses document large amounts of coronavirus particles  
89 both within exocytic vesicles and at the surface of infected cells, that form syncytia. By  
90 expressing the spike proteins of SARS-CoV-2 and other coronaviruses, we have gained insights  
91 into the mechanisms of their functional activation and which proteins have the potential to  
92 cause cardiac damage.

## 93 Results

### 94 Expression of virus entry factors in cardiomyocytes

95 We assessed whether ACE2, the SARS-CoV-2 receptor, and the spike-activating proteases  
96 TMPRSS2 and cathepsin B (CTSB) are expressed during the differentiation process of human  
97 embryonic stem cells into cardiomyocytes. The ACE2 transcription level peaked at day-20, those  
98 of cathepsin B remained stable, and TMPRSS2 transcripts were never detectable (**S1 Table**).

99 Thus, we characterized our hiPSC-CM at this differentiation stage. Super resolution  
100 immunofluorescence confocal microscopy documented cell surface expression of ACE2, and the  
101 striated F-actin organization typical of cardiomyocytes (Fig. **1A**). In particular, ACE2 receptors  
102 clustered in raft-like puncta diffusely distributed across the sarcolemma and extended into  
103 filopodia contacting adjacent cardiomyocytes (Fig. **1A**, arrow highlights filopodia).

104 To further characterize day-20 differentiated cardiomyocytes, we analyzed their total cellular  
105 transcriptome by RNAseq. Cardiomyocyte differentiation markers were expressed in our hiPSC-

106 CM at levels similar to those documented in two other hiPSC-CM lines used for SARS-CoV-2  
107 infection studies (Fig. **1B**, compare N with P and S panels). The ACE2 receptor was expressed at  
108 higher levels in our cardiomyocytes than in those used in the other studies. In all three studies  
109 transcripts of the proteases cathepsins B, cathepsin L, and furin, were detected, but transcripts  
110 of the protease (TMPRSS2) that enables endosome independent viral entry in the lungs [24],  
111 were below detection levels (less than 0.5 counts/million in at least 2 samples).

## 112 Highly productive cardiomyocyte infection

113 We inoculated two independent lines of spontaneously beating hiPSC-CMs with SARS-CoV-2 at  
114 0.01 multiplicity of infection (MOI) and monitored virus titer in the supernatant by plaque  
115 assay. Two days after inoculation about  $10^6$  infectious units/ml were produced (Fig. **2A**).  
116 Strikingly, RNAseq analyses indicated that viral transcripts account for about 88% of the total  
117 cellular transcriptome (Fig. **2B**, left panel). At the peak of SARS-CoV-2 infections of hiPSC-CM  
118 lines in two other studies, viral transcripts accounted for about 56% and 35% of the total  
119 cellular transcriptome (Fig. **2B**, center and right panel).

120 We then sought to document expression, processing and localization of the viral proteins.  
121 Immunoblot analyses of viral spike (S), nucleocapsid (N), and membrane (M) proteins  
122 confirmed high expression levels and accurate processing (Fig. **2C-E**, left panels).  
123 Immunofluorescence (IF) microscopy confirmed localization of all three proteins to the  
124 expected subcellular compartments (Fig. **2C-E**, right panels). Taken together, these analyses  
125 confirmed highly productive infection of hiPSC-CMs by SARS-CoV-2.

126

## 127 **Abundant progeny virions in exocytic vesicles**

128 We then assessed by transmission electron microscopy (TEM) whether SARS-CoV-2 infection of  
129 hiPSC-CM recapitulates features characteristic of other coronavirus infections. TEM analyses  
130 revealed canonical double-membrane vesicles, endoplasmic reticulum-Golgi intermediate  
131 complex and smooth-walled exocytic vesicles containing numerous 65-90 nm particles (Fig. **3A**,  
132 yellow box). These are progeny virions with typical helical ribonucleocapsids surrounded by a  
133 membrane (Fig. **3A**, inset). Other characteristic features of coronavirus infections detected in  
134 hiPSC-CM include clustered membranes (Fig. **3B**, yellow arrows), vesicle packets filled with virus  
135 particles (Fig. **3C**, blue arrows) and exocytic vesicles filled with virus particles (Fig. **3D**, white  
136 arrows). Thus, TEM analyses of infected hiPSC-CM detected alterations of the cellular secretory  
137 pathway characteristic of coronavirus infections.

## 138 **Virus-like particles with knob-like spikes on the cardiomyocyte surface**

139 We assessed whether typical SARS-CoV-2 particles are present on the surface of hiPSC-CM by  
140 scanning electron microscopy (SEM), which revealed numerous particles on the plasma  
141 membrane. Fig. **4A** shows an hiPSC-CM heavily carpeted with SARS-CoV-2 particles (rightmost  
142 cell) contacting two less heavily carpeted hiPSC-CMs at upper and lower left with boundaries  
143 clearly demarcated, creating a patchwork mosaic. The inset magnifies the boundary highlighted  
144 by the yellow box. Viral particles cover the entire surface of the hiPSC-CM, including pseudo  
145 and filopodia and show typical knob-like spikes (Fig. **4B**). Thus, SEM analyses detected abundant  
146 *bona fide* virus-like particles on the hiPSC-CM surface, and individual cells produce different  
147 amount of virus particles.

## 148    **Cytopathic effects and fusion of infected cardiomyocytes**

149    We also monitored the cytopathic effects of SARS-CoV-2 infection of hiPSC-CMs by IF confocal  
150    microscopy. In Fig. **5A** the nuclei of infected cells were stained with DAPI (blue), and the viral M  
151    protein and cytoskeletal alpha-actinin with specific antibodies (green and red, respectively). Fig.  
152    **5B** shows the same analyses on control uninfected hiPSC-CMs. In Fig. **5A** giant cells with central  
153    clusters of nuclei, named syncytia, were documented. These M-protein positive hiPSC-CMs  
154    demonstrated sarcomeric disassembly/fragmentation shown by disintegration of  $\alpha$ -actinin Z-  
155    discs into randomly distributed puncta (Fig. **5C**). Neither syncytia formation nor cytoskeletal  
156    disassembly were observed in mock-infected cells (Fig. **5D**).

157    To quantify SARS-CoV-2 mediated hiPSC-CM fusion,  $\alpha$ -actinin and SARS-CoV-2 M protein co-  
158    labeled cells were imaged by IF confocal microscopy and syncytia were counted. While no  
159    syncytia were observed for mock infected cells, ~4 were counted per field of SARS-CoV-2  
160    infected cells (Fig. **5E**, polyploidy index). As an alternative method to quantify fusion, we  
161    counted the number of nuclei per cell, finding an average of about 2 in infected cells, double  
162    that counted in the mock control (Fig. **5E**, nuclearity index). Thus, some infected  
163    cardiomyocytes fuse and cytoskeletal disintegration may favor syncytia formation.

## 164    **A fluorescent viral spike protein fuses cardiomyocytes**

165    To characterize the mechanism of cell fusion, we engineered a SARS-CoV-2 full-length  
166    recombinant spike protein fused to modified Emerald green fluorescent protein at its carboxyl-  
167    terminus (CoV-2 S-mEm) (Fig. **6A**, left panel). We validated this reagent in Vero cells that, like  
168    hiPSC-CMs, express ACE2 but not TMPRSS2. In these cells CoV-2 S-mEm was appropriately



169 cleaved (Fig. **6A**, right panel). Super resolution confocal microscopy localized CoV-2 S-mEm to  
170 hair-like plasma membrane extensions (Fig. **6B**). Fluorescent activated cell sorting confirmed  
171 CoV-2 S-mEm cell surface expression (Fig. **6C**). Live cell imaging tracked spread of CoV-2 S-mEm  
172 signal from cell to cell through membrane fusion, generating syncytia (Fig. **6D** and **S2** Movie).  
173 We then assessed whether CoV-2 S-mEm fuses cardiomyocytes. Despite overall transfection  
174 efficiency <5%, CoV-2 S-mEM expressing hiPSC-CMs produced syncytia with nuclei frequently  
175 arranged in clusters or rosettes (Fig. **7A**, and **S3** Movie). Some syncytia were characterized by  
176 circular or oval enucleated cytoskeletal “corpses” shown by F-actin phalloidin staining (Fig. **7B**,  
177 yellow arrows). Super resolution confocal microscopy demonstrated fluorescent signal at the  
178 tips of dynamic pseudo- and filopodia contacting neighboring hiPSC-CMs (Fig. **7C**, circle). Since  
179 hiPSC-CMs do not express TMPRSS2, we conclude that in these cells another protease must  
180 activate the SARS-CoV-2 spike.

## 181 Furin activation of spike is required for cardiomyocyte fusion

182 Knowing that furin, a protease located in the *trans*-Golgi apparatus that contributes to SARS-  
183 CoV-2 spike activation, is expressed in hiPSC-CM (Fig. **1B**), we sought to block its function  
184 biochemically and genetically. For biochemical interference we used Decanoyl-RVKR-CMK (furin  
185 inhibitor, FI), a cell-permeable peptide-based molecule that irreversibly blocks its catalytic site.  
186 For genetic interference, we generated an expression vector differing from CoV-2 S through the  
187 single amino acid change R682S expected to inactivate the furin cleavage site [25] (Fig. **6A**, left  
188 panel).

189 We validated these approaches in Vero cells. The left panel of Fig. **8A** documents progressive  
190 inhibition of CoV-2 S protein processing (S0 cleavage into S1 and S2) by increasing  
191 concentrations of FI. The second and third panels show that fusion occurs in cells expressing  
192 CoV-2 S in the absence of FI, but not in its presence. The last panel shows that the R682S  
193 mutant of CoV-2 S is fusion-inactive.

194 Fig. **8B** shows that furin activation of spike is required also for cardiomyocyte fusion. The left  
195 panel documents strong inhibition of spike protein processing by high concentration of FI, and  
196 complete lack of processing of the R682S mutant. The other panels show that FI or the mutant  
197 inhibits fusion of cardiomyocytes. Fig. **8C** shows a quantitative analysis of hiPSC-CM fusion  
198 documenting approximately 99% inhibition by FI and by the mutation. Thus, expression of furin-  
199 activated SARS-CoV-2 spike protein in hiPSC-CM causes cell fusion that can be corrected  
200 pharmacologically.

## 201 **The MERS spike drives cardiomyocyte fusion with slow kinetics**

202 Since SARS-CoV [26] and Middle East respiratory syndrome (MERS) [27] can cause  
203 cardiovascular complications, we asked whether their spike proteins can fuse hiPSC-CM. As  
204 negative control we used the spike protein of the common cold coronavirus 229E. Fig. **9A** shows  
205 correct processing of the MERS spike protein, and Fig. **9B-C** demonstrates that this protein  
206 induces syncytia formation. Comparative analyses indicated that the MERS spike protein drove  
207 syncytia production with slower kinetics than the SARS-CoV-2 spike, while the spike proteins of  
208 SARS-CoV and of the common cold coronavirus HCoV-229E were inactive. These levels of fusion

209 activity correlate with the amounts of cardiovascular complications observed in infections with  
210 the respective viruses.

## 211 Discussion

212 Viruses can cause cardiomyopathies, but the mechanisms of disease are difficult to characterize  
213 experimentally [28, 29]. The cardiac complications frequently observed in COVID-19 patients  
214 are usually tentatively attributed to aberrant host responses to acute respiratory infection.  
215 However, SARS-CoV-2 replication has occasionally been confirmed in autopsy cardiac tissue.  
216 While animal models to study SARS-CoV-2 infections of the heart are being developed, we have  
217 characterized virus spread in hiPSC-CM. Infection of these cells was highly efficient, with the  
218 virus taking over almost 90% of the cellular transcriptome. SARS-CoV-2 infection re-shaped  
219 subcellular morphologies [30, 31], secretory vesicles were filled with viral progeny, and virus  
220 particles with knob-like spikes carpeted the cardiomyocyte surface.

221 Human iPSC-CM are permissive to SARS-CoV-2 infection. Two previous studies documented  
222 that viral transcript account for up to 35% or 55% of the hiPSC-CM transcriptome, respectively  
223 [19, 21], comparing favorably but not exceeding 65% cellular transcriptome takeover reported  
224 after infection of Vero cells [32]. We do not know why cell takeover was more extensive in our  
225 hiPSC-CM infections, but we note that the expression levels of the ACE2 receptor transcript are  
226 high in our study, intermediate in that of Sharma et al., and low in that of Perez-Bermejo. Thus,  
227 levels of ACE2 expression correlate with levels of cellular transcriptome takeover.

228 We document here syncytia formation in infected hiPSC-CM. Most spike protein produced in  
229 infected cells engages the other viral components early in the secretory pathway, and progeny

230 virus particles bud intracellularly. Nevertheless, some spike protein reaches the surface, where  
231 it can interact with the ACE2 receptor on the surface of other cells, starting cell-cell fusion.  
232 Indeed, cells infected by SARS-CoV-2 can fuse with neighboring cells to form large  
233 multinucleated syncytia, which have been documented in autopsy material from the respiratory  
234 tract of COVID-19 patients [33-35] and in *in vitro* models of airway epithelia infection [36-38]  
235 [39]. However, cell-cell fusion was not reported in previously published hiPSC-CM studies. In  
236 our studies, expression of ACE2 receptor was higher and infection more efficient. Thus, higher  
237 expression levels of both the spike protein and its receptor may account for more pronounced  
238 cell fusion in our study.

239 Proper proteolytic activation of the viral spike is required both for cell entry and cell-cell fusion  
240 [40]. In airway epithelial cells, fusion is triggered by the protease TMPRSS2, which processes the  
241 spike protein to set free its fusion peptide and elicit membrane fusion. SARS-CoV-2 has evolved  
242 a multibasic site at the S1-S2 boundary that allows for proteolytic processing of spike by furin in  
243 the *trans*-Golgi complex of the producer cell, rather than during entry into target cells. In 293T  
244 and in Vero cells furin is not absolutely required for cell-cell fusion, while the multibasic site and  
245 the concomitant presence of TMPRSS2 sustain this process [41]. Since TMPRSS2 is not  
246 expressed in cardiomyocytes, in these cells another protease may trigger fusion. This  
247 suggestion is consistent with the observation that coronaviruses can recruit a cohort of  
248 different protease to confer fusion competence to their spike [42, 43]. Thus, in the heart and  
249 other extrapulmonary organs SARS-CoV-2 pathogenesis may be independent of TMPRSS2.

250 Understanding the mechanisms of SARS-CoV-2 spread in hiPSC-CM can inform antiviral  
251 therapies. We show here that the peptide-based Decanoyl-RVKR-CMK furin protease inhibitor

252 abolishes cytopathology in cardiomyocytes. A derivative of this furin inhibitor with improved  
253 bioavailability and specificity could be advanced towards clinical trials as an inhibitor of COVID-  
254 19 induced cardiac disease.

255

## 256 MATERIALS AND METHODS

### 257 Spinner culture cardiac differentiation of human-iPSCs

258 Obtained under Mayo Clinic IRB protocol, patient and control human fibroblast-derived iPSCs  
259 were maintained in mTESR1 basal media with mTESR supplement on plates coated with Geltrex  
260 (in DMEM/F12 media). Undifferentiated hiPSCs were transitioned and expanded in  
261 suspension/spinner culture in DMEM/F-12 plus Glutamax, StemPro supplement, BSA and bFGF  
262 with Rock Inhibitor Y27632 combined with mTESR1 media, and then chemically differentiated  
263 by CHIR/IWP-4 into CMs in RPMI 1640 plus B27 minus insulin supplement as beating  
264 aggregates. Detailed spinner culture cardiac differentiation protocol is available from J.W.S.  
265 upon request. Differentiated hiPSC-CMs were maintained in Gibco™ Cardiomyocyte  
266 Maintenance Medium and attached to fibronectin-coated glass coverslips. Human H9  
267 embryonic stem cells (WiCell) were chemically differentiated into CMs using an analogous  
268 protocol in monolayer culture. EdU (5-ethynyl-2'-deoxyuridine) labeling of growing hiPSC-CMs  
269 and detection were done as described by the manufacturer (Thermo-Fisher).

270

## 271 SARS-CoV-2 infection of hiPSC-CM

272 SARS-CoV-2/UW-001/Human/2020/Wisconsin (UW-001) was isolated from a mild case in  
273 February 2020 and passaged in VeroE6 cells expressing TMPRSS2. The virus was used to infect  
274 hiPSC-CMs in monolayer at MOI of 1.0 to 0.001 for 30 minutes at 37°C. Unbound virus was then  
275 washed-off and fresh media replaced. At the various time points, cells were fixed or extracted,  
276 and samples were collected, and the vessels decontaminated. An MOI of 0.01 for 24-48 hours  
277 proved optimal for observing early stages of SARS-CoV-2 infection in hiPSC-CMs. Beyond 72  
278 hours, even at low starting MOI, cytopathic lysis overwhelmed hiPSC-CM cultures. Highly  
279 permissive SARS-CoV-2 infection was observed in 3 different, equivalently differentiated hiPSC-  
280 CMs from unrelated donors.

## 281 Virus titration

282 SARS-CoV-2 infectious virus produced by hiPSC-CM was titered by plaque-forming assay done in  
283 confluent Vero E6/TMPRSS2 cells. 12-wells tissue culture plates were infected with supernatant  
284 (undiluted and 10-fold dilutions from  $10^1$  to  $10^5$ ) for 30 minutes at 37°C. After initial exposure,  
285 the Vero/TMPRSS2 cells were washed three times to remove unbound virus and the media was  
286 replaced with 1.0% methylcellulose-media. After an incubation of three days at 37°C, the cells  
287 were fixed and stained with crystal violet solution and plaque number counted to determine  
288 plaque-forming units (PFU)/ml.

## 289 RNA sequencing

290 The hiPSC CMs were infected with SARS-CoV-2/UW001/Human/2020/Wisconsin (UW-001) at  
291 MOI of 0.01. Cells were lysed in Trisol and were kept at -80°C. Total RNA of the lysate was

292 extracted using Direct-zol RNA Miniprep kit (R2050). Library preparation and sequencing was  
293 performed at Mayo Clinic Genome Analysis Core (GAC).

294 Briefly, cDNA libraries were prepared using 100 ng of total RNA according to the manufacturer's  
295 instructions for the Illumina TruSeq Stranded Total RNA Sample Prep Kit with Ribo-Zero Gold  
296 (Illumina, San Diego, CA). The concentration and size distribution of the completed libraries  
297 were determined using an Agilent Bioanalyzer DNA 1000 chip (Santa Clara, CA) and Qubit  
298 fluorometry (Invitrogen, Carlsbad, CA). Libraries were sequenced at three samples per lane to  
299 generate approximately 119 to 137 million fragment reads per sample following Illumina's  
300 standard protocol using the Illumina cBot and HiSeq 3000/4000 PE Cluster Kit. The flow cells  
301 were sequenced as 100 X 2 paired end reads on an Illumina HiSeq 4000 using HiSeq 3000/4000  
302 sequencing kit and HD 3.4.0.38 collection software. Base-calling was performed using Illumina's  
303 RTA version 2.7.7.

## 304 **Bioinformatics and data analysis**

305 The quality of the raw RNA-seq data was assessed by fastqc v0.20.1 [44], and quality reads  
306 were filtered and aligned against human genome (hg19) using STAR alignment (v2.7.8a) [45] in  
307 galaxy platform (<https://usegalaxy.org>). The aligned reads were counted using htseq-count  
308 v0.9.1 [46] and 0.5 read counts per million (CPM) in at least two samples was used as an  
309 expression threshold. Trimmed mean of M values normalized (TMM) [47] and log2 transformed  
310 data was used for plotting heatmaps and differential analysis in limma [48]. For the detection of  
311 viral transcripts, quality filtered reads were aligned against SARS-CoV-2 genome (MT039887.1)  
312 using BWA-MEM v0.7.17.1 (<https://arxiv.org/abs/1303.3997>). Alignment summary statistics

313 was computed using samtools idxstats v2.0.3 [49]. The same workflow was used to re-analyze  
314 the data of ([19], GSE150392) and ([21], GSE156754) RNA-seq data except for SARS-CoV-2  
315 genome (MN985325.1). The raw RNA-seq data from this study are available at Gene Expression  
316 Omnibus with accession number xxxx [to be added].

## 317 Immunocytochemistry

318 Coverslips were fixed with neutral buffered formalin for 15 min at room temperature, washed  
319 with PBS/0.05% Tween-20 and blocked in (PBS/5% normal goat serum or 3% BSA/0.3% Triton X-  
320 100) at room temperature for 1 hour. Coverslips were incubated in primary antibodies diluted  
321 in (PBS/1%BSA/0.3% Triton X-100) overnight at 4°C, washed extensively and incubated with  
322 diluted secondary antibodies (1:400) at room temperature for 1 hour, then DAPI stained for 10  
323 min at room temperature. Coverslips were mounted on slides with Prolong Gold Antifade  
324 Mountant (ThermoFisher) and stored at 4°C. Coverslips were imaged using a Zeiss LSM780 or  
325 Elyra PS.1 Super Resolution confocal microscope. Antibodies and reagents for  
326 immunocytochemistry included: ACTC1 (Actin  $\alpha$ -sarcomeric mouse mAb clone 5C5 (Sigma),  
327 Phalloidin Alexa Fluor-568 conjugated (Invitrogen), SARS-CoV-2 Spike mAb clone 1A9  
328 (GeneTex), SARS-CoV-2 M rabbit polyclonal Ab (Argio Biolaboratories), SARS-CoV-2  
329 Nucleocapsid clone 1C7 (Bioss Antibodies), ACE2 goat polyclonal Ab (R&D Systems) and  
330 ATP2A2/SERCA2 rabbit polyclonal Ab (Cell Signaling).

## 331 Transmission electron microscopy

332 Cells were washed with PBS and placed in Trump's universal EM fixative[50] (4% formaldehyde,  
333 1% glutaraldehyde in 0.1 M phosphate buffer, pH 7.2) for 1 hr or longer at 4° C. After 2 rinses in



334 0.1 M sodium phosphate buffer (pH 7.2), samples were placed in 1% osmium tetroxide in the  
335 same buffer for 1 hr at room temperature. Samples were rinsed 2 times in distilled water and  
336 dehydrated in an ethanolic series culminating in two changes of 100% acetone. Tissues were  
337 then placed in a mixture of Epon/Araldite epoxy resin and acetone (1:1) for 30 min, followed by  
338 2 hrs in 100% resin with 2 changes. Finally, samples were placed in fresh 100% resin  
339 polymerized at 65° C for 12 hrs or longer. Ultrathin (70-90 nm) sections were cut with a  
340 diamond knife and stained with lead citrate. Images were captured with a Gatan digital camera  
341 on a JEOL 1400 plus transmission electron microscope operated at 80KeV.

## 342 Scanning electron microscopy

343 Fixed in Trump's (1% glutaraldehyde and 4% formaldehyde in 0.1 M phosphate buffer, pH 7.2)  
344 [50], tissue was then rinsed for 30 min in 2 changes of 0.1 M phosphate buffer, pH 7.2.  
345 Following dehydration in progressive concentrations of ethanol to 100% the samples were  
346 critical-point dried. Specimens were then mounted on aluminum stubs and sputter coated with  
347 gold/palladium. Images were captured on a Hitachi S4700 scanning electron microscope  
348 operating at 3kV.

## 349 HeLa and Vero cells

350 HeLa cells were cultured in Dulbecco's modified Eagle's medium (DMEM) supplemented with  
351 10% FBS. Vero-hSLAM (Vero cells stably expressing human signaling lymphocyte activation  
352 molecules, kindly provided by Y. Yanagi; these cells are described simply as Vero cells in this  
353 manuscript) [51] were maintained in DMEM supplemented with 10% FBS and 0.5 mg of  
354 G418/ml. All cell lines were incubated at 37°C with 5% CO<sub>2</sub>.

## 355 Plasmids and mutagenesis

356 The codon-optimized SARS-CoV2 S-protein gene (YP\_009724390) was synthesized by Genewiz  
357 in a pUC57-Amp plasmid (kindly provided by M. Barry). The S-protein coding sequence was  
358 cloned into a pCG mammalian expression plasmid [52] using unique restriction sites *Bam*HI and  
359 *Spe*I. The SARS CoV S-protein (VG40150-G-N) and the MERS S-protein (C-terminal FLAG tag,  
360 VG40069-CF) purchased from Sino Biological, were cloned into the pCG vector for comparative  
361 studies. The SARS-CoV-2 S-mEmerald construct was made by cloning the mEmerald sequence  
362 (Addgene, Plasmid #53976) to the C-terminal end of the SARS CoV-2 S-protein in the pCG  
363 expression vector. A flexible 6 amino acid-linker (TSGTGG) was used to separate the two  
364 proteins. All expression constructs were verified by sequencing the entire coding region. The  
365 R682S furin cleavage mutation was introduced into the SARS-CoV-2 S expression plasmid by  
366 QuikChange site-directed mutagenesis (Agilent Technologies, Santa Clara, CA) according to the  
367 manufacturer's instructions. The clones were verified by sequencing the S-protein gene in the  
368 vicinity of the mutation. Two independent clones were tested.

## 369 Immunoblots

370 Vero cells were transfected with spike protein expression constructs using the GeneJuice  
371 transfection reagent (Novagen). The indicated S-protein expression constructs (1  $\mu$ g) were  
372 transfected into  $2.5 \times 10^5$  Vero cells in 12-well plates. Thirty-six hours post-transfection, extracts  
373 were prepared using cell lysis buffer (Cell Signaling Technology, #9803) supplemented with  
374 cOmplete protease inhibitor cocktail (Roche, Basel, Switzerland) and the proteins separated by  
375 sodium dodecyl sulfate-polyacrylamide gel electrophoresis (SDS-PAGE) (4 to 15% gradient)

376 under reducing conditions. For hiPSC-CMs transfected with CoV-2 S (2 µg/well in 6-well plates),  
377 extracts were prepared in cell lysis buffer as above (but also including PMSF), and separated by  
378 SDS-PAGE under reducing (β-Mercaptoethanol) or non-reducing conditions. The S-proteins  
379 were visualized on an immunoblot using the anti-S specific monoclonal antibody 1A9 (GeneTex,  
380 GTX632604; 1:2000 dilution) which binds the S2 subunit of SARS CoV and SARS-CoV-2 S-  
381 proteins. An anti-mouse horseradish peroxidase (HRP)-conjugated secondary antibody was  
382 used to reveal the bands. MERS S-protein was detected using a monoclonal anti-FLAG M2-HRP  
383 conjugated antibody (SIGMA, A8592 @ 1:2000) which bound to a C-terminal FLAG-tag. The  
384 expression of the mEmerald tag was verified using a polyclonal anti-GFP antibody (Abcam,  
385 ab290 @ 1:5000). For hiPSC-CMs infected with SARS-CoV-2 (MOI 0.01, 48 hours), extracts were  
386 prepared in cell lysis buffer as above (but also including PMSF), separated by SDS-PAGE and  
387 blotted with S, M and N antibodies as described under Immunohistochemistry above.

## 388 Cell-cell fusion assays

389 For spike glycoprotein-mediated cell-to-cell fusion,  $1.5 \times 10^5$  Vero cells in 24-well plates were  
390 transfected with 0.5 µg of the indicated S-protein expression vector using the GeneJuice  
391 transfection reagent (Novagen) and syncytia formation monitored for 24-48 hours post-  
392 transfection. Images were collected by Nikon Eclipse TE300 using NIS-Elements F 3.0 software  
393 (Nikon Instruments, Melville, NY, USA). For recombinant spike glycoprotein-mediated fusion in  
394 hiPSC-CMs, subconfluent day-20 differentiated cells plated on fibronectin-coated glass  
395 coverslips in 6-well plates were transfected with 1-2 µg plasmid using Lipofectamine 3000. For

396 CoV-2 S-mEm in hiPSC-CM experiments syncytia formation became obvious within 6 hours of  
397 transfection.

## 398 **Furin inhibitor treatment**

399 Furin Inhibitor I (Decanoyl-RVKR-CMK, Calbiochem, #344930) dissolved in DMSO was added to  
400 Vero or hiPSC-CM cell culture medium 2-hours post transfection. Cell-cell fusion was followed  
401 for 72-hours (for Vero cells) and 5 days for hiPSC-CMS with media and inhibitor refreshed on  
402 day-3. Whole cell extracts were separated on SDS-PAGE and immunoblotted for SARS-CoV-2 S  
403 as described above or cells fixed and stained by crystal violet.

## 404 **Quantification of hiPSC-CM fusion**

405 Human iPSC-CM were plated on 35 mm round glass bottom dishes and transfected with SARS-  
406 CoV-2 spike protein, with or without furin inhibitor treatment, or transfected with SARS-CoV-2  
407 R682S mutant spike protein, as previously described. Bright-field microscopy images were  
408 taken at 10x magnification from randomly chosen areas of each culture dish. Five images from  
409 three independent replicates were counted for each condition. Images were manually counted  
410 for number of nuclei, number of syncytia, and number of nuclei per cell using Olympus  
411 Dimension cellSens software. Percent nuclei within syncytium denotes the percent of total  
412 nuclei counted within syncytium at 48 hours post-transfection. Syncytia are defined by a cell  
413 containing three or more nuclei. ANOVA statistical analysis was carried out using GraphPad  
414 Prism software.

415

## 416 Fluorescence-activated cell sorting

417 To determine S-protein cell surface expression levels, HeLa cells ( $8 \times 10^5$  in a 6-well plate) were  
418 transfected with the indicated S-protein expression plasmids (2  $\mu$ g using GeneJuice transfection  
419 reagent). Thirty-six hours post-transfection, cells were washed in PBS and detached by  
420 incubating with Versene (Life Technologies) at 37°C for 10 min. The resuspended cells were  
421 washed twice with cold fluorescence-activated cell sorter (FACS) wash buffer (phosphate  
422 buffered saline, 2% FBS, 0.1% sodium azide) and then incubated with the anti-S-protein mAb  
423 1A9 (GeneTex; 1:50 dilution) for 1 hour on ice. Cells were washed three times with cold FACS  
424 wash buffer and incubated with an AF647-conjugated secondary antibody (Thermo Fisher  
425 Scientific, a21235 @ 1:200) for 1 hour on ice. After three washes with FACS wash buffer, cells  
426 were fixed in 4% paraformaldehyde and analyzed with a FACSCalibur (BD Biosciences, San Jose,  
427 CA) cytometer and FlowJo software (Tree Star Inc., Ashland, OR)

## 428 Time lapse confocal microscopy

429 Vero cells were sparsely plated on a glass-bottom 35-mm dish and transfected with 1  $\mu$ g of the  
430 SARS-CoV-2 S-mEmerald expression construct using GeneJuice transfection reagent. Time lapse  
431 confocal microscopy with images taken every 30-40 minutes for 12-hours, was performed 24-  
432 hours post-transfection on a Zeiss LSM780 equipped with a heated CO<sub>2</sub> chamber. For time-  
433 lapse confocal fluorescence video microscopy of CoV-2 S-mEm spike glycoprotein transfected  
434 hiPSC-CMs, images were captured every 30 minutes over a 12-hour time period starting 24  
435 hours after transfection on a Zeiss LSM780 equipped with a heated CO<sub>2</sub> chamber.

436

## 437 Acknowledgments

438 We thank Jeff Salisbury and the Mayo Clinic Microscopy and Cell Analysis Core facility for  
439 experimental and technical support; Tim L. Emmerzaal and Tamás Kozicz for experimental  
440 support; Mike Barry for the SARS-CoV-2 spike coding sequence; Peter Rottier, Mathieu Mateo,  
441 Christian Pfaller, Michael Muehlebach and Christoph Springfield for insightful comments on the  
442 manuscript; and the Mayo Clinic Graduate School of Biomedical Sciences for graduate student  
443 support (D.R.P. and D.J.C.). We also thank Andrew Badley and the Mayo Clinic COVID-19  
444 Taskforce for support. Wanek Family Program for HLHS-Stem Cell Pipeline: Timothy J. Nelson  
445 (Director), Boyd Rasmussen and Frank J. Secretó.

## 446 References

- 447 1. Perlman S, Masters PS. Coronaviridae: The Viruses and Their Replication. In: Howley PM,  
448 Knipe DM, Whelan S, editors. *Fields Virology: Emerging Viruses*. 7 ed 2020. p. 410-48.
- 449 2. Guo T, Fan Y, Chen M, Wu X, Zhang L, He T, et al. Cardiovascular Implications of Fatal  
450 Outcomes of Patients With Coronavirus Disease 2019 (COVID-19). *JAMA Cardiol*.  
451 2020;5(7):811-8. Epub 2020/03/29. doi: 10.1001/jamacardio.2020.1017. PubMed PMID:  
452 32219356; PubMed Central PMCID: PMC7101506.
- 453 3. Topol EJ. COVID-19 can affect the heart. *Science*. 2020;370(6515):408-9. Epub 2020/09/25.  
454 doi: 10.1126/science.abe2813. PubMed PMID: 32967937.
- 455 4. Madjid M, Safavi-Naeini P, Solomon SD, Vardeny O. Potential Effects of Coronaviruses on  
456 the Cardiovascular System: A Review. *JAMA Cardiol*. 2020. Epub 2020/03/29. doi:  
457 10.1001/jamacardio.2020.1286. PubMed PMID: 32219363.
- 458 5. Chung MK, Zidar DA, Bristow MR, Cameron SJ, Chan T, Harding CV, 3rd, et al. COVID-  
459 19 and Cardiovascular Disease: From Bench to Bedside. *Circ Res*. 2021;128(8):1214-36.  
460 Epub 2021/04/16. doi: 10.1161/CIRCRESAHA.121.317997. PubMed PMID: 33856918;  
461 PubMed Central PMCID: PMC8048382.
- 462 6. Sparks MA, South AM, Badley AD, Baker-Smith CM, Battle D, Bozkurt B, et al. Severe  
463 Acute Respiratory Syndrome Coronavirus 2, COVID-19, and the Renin-Angiotensin System:  
464 Pressing Needs and Best Research Practices. *Hypertension*. 2020;76(5):1350-67. Epub  
465 2020/09/29. doi: 10.1161/HYPERTENSIONAHA.120.15948. PubMed PMID: 32981369;  
466 PubMed Central PMCID: PMC7685174.
- 467 7. Wu Z, McGoogan JM. Characteristics of and Important Lessons From the Coronavirus  
468 Disease 2019 (COVID-19) Outbreak in China: Summary of a Report of 72314 Cases From

- 469 the Chinese Center for Disease Control and Prevention. *JAMA*. 2020;323(13):1239-42. Epub  
470 2020/02/25. doi: 10.1001/jama.2020.2648. PubMed PMID: 32091533.
- 471 8. Mills RJ, Humphrey SJ, Fortuna PRJ, Lor M, Foster SR, Quaife-Ryan GA, et al. BET  
472 inhibition blocks inflammation-induced cardiac dysfunction and SARS-CoV-2 infection.  
473 *Cell*. 2021;184(8):2167-82 e22. Epub 2021/04/04. doi: 10.1016/j.cell.2021.03.026. PubMed  
474 PMID: 33811809; PubMed Central PMCID: PMC7962543.
- 475 9. Gauchotte G, Venard V, Segondy M, Cadoz C, Esposito-Fava A, Barraud D, et al. SARS-  
476 Cov-2 fulminant myocarditis: an autopsy and histopathological case study. *Int J Legal Med*.  
477 2021;135(2):577-81. Epub 2021/01/05. doi: 10.1007/s00414-020-02500-z. PubMed PMID:  
478 33392658; PubMed Central PMCID: PMC7779100.
- 479 10. Albert CL, Carmona-Rubio AE, Weiss AJ, Procop GG, Starling RC, Rodriguez ER. The  
480 Enemy Within: Sudden-Onset Reversible Cardiogenic Shock With Biopsy-Proven Cardiac  
481 Myocyte Infection by Severe Acute Respiratory Syndrome Coronavirus 2. *Circulation*.  
482 2020;142(19):1865-70. Epub 2020/10/01. doi: 10.1161/CIRCULATIONAHA.120.050097.  
483 PubMed PMID: 32997947.
- 484 11. Bearnse M, Hung YP, Krauson AJ, Bonanno L, Boyraz B, Harris CK, et al. Factors associated  
485 with myocardial SARS-CoV-2 infection, myocarditis, and cardiac inflammation in patients  
486 with COVID-19. *Mod Pathol*. 2021. Epub 2021/03/18. doi: 10.1038/s41379-021-00790-1.  
487 PubMed PMID: 33727695.
- 488 12. Tavazzi G, Pellegrini C, Maurelli M, Belliato M, Sciutti F, Bottazzi A, et al. Myocardial  
489 localization of coronavirus in COVID-19 cardiogenic shock. *Eur J Heart Fail*.  
490 2020;22(5):911-5. Epub 2020/04/11. doi: 10.1002/ejhf.1828. PubMed PMID: 32275347;  
491 PubMed Central PMCID: PMC7262276.



- 492 13. Lindner D, Fitzek A, Bräuninger H, Aleshcheva G, Edler C, Meissner K, et al. Association of  
493 Cardiac Infection With SARS-CoV-2 in Confirmed COVID-19 Autopsy Cases. *JAMA*  
494 *Cardiology*. 2020. doi: 10.1001/jamacardio.2020.3551.
- 495 14. Pietsch H, Escher F, Aleshcheva G, Baumeier C, Morawietz L, Elsaesser A, et al. Proof of  
496 SARS-CoV-2 genomes in endomyocardial biopsy with latency after acute infection. *Int J*  
497 *Infect Dis*. 2021;102:70-2. Epub 2020/10/13. doi: 10.1016/j.ijid.2020.10.012. PubMed  
498 PMID: 33045427; PubMed Central PMCID: PMC7546659.
- 499 15. Knowlton KU. Pathogenesis of SARS-CoV-2 induced cardiac injury from the perspective of  
500 the virus. *J Mol Cell Cardiol*. 2020;147:12-7. Epub 2020/08/11. doi:  
501 10.1016/j.yjmcc.2020.08.002. PubMed PMID: 32771409; PubMed Central PMCID:  
502 PMC7409803.
- 503 16. Halushka MK, Vander Heide RS. Myocarditis is rare in COVID-19 autopsies: cardiovascular  
504 findings across 277 postmortem examinations. *Cardiovasc Pathol*. 2021;50:107300. Epub  
505 2020/11/03. doi: 10.1016/j.carpath.2020.107300. PubMed PMID: 33132119; PubMed  
506 Central PMCID: PMC7583586.
- 507 17. Kawakami R, Sakamoto A, Kawai K, Gianatti A, Pellegrini D, Nasr A, et al. Pathological  
508 Evidence for SARS-CoV-2 as a Cause of Myocarditis: JACC Review Topic of the Week. *J*  
509 *Am Coll Cardiol*. 2021;77(3):314-25. Epub 2021/01/23. doi: 10.1016/j.jacc.2020.11.031.  
510 PubMed PMID: 33478655; PubMed Central PMCID: PMC7816957.
- 511 18. Hou YJ, Okuda K, Edwards CE, Martinez DR, Asakura T, Dinnon KH, 3rd, et al. SARS-  
512 CoV-2 Reverse Genetics Reveals a Variable Infection Gradient in the Respiratory Tract.  
513 *Cell*. 2020;182(2):429-46 e14. Epub 2020/06/12. doi: 10.1016/j.cell.2020.05.042. PubMed  
514 PMID: 32526206; PubMed Central PMCID: PMC7250779.

- 515 19. Sharma A, Garcia G, Jr., Wang Y, Plummer JT, Morizono K, Arumugaswami V, et al.  
516 Human iPSC-Derived Cardiomyocytes Are Susceptible to SARS-CoV-2 Infection. *Cell Rep*  
517 *Med.* 2020;1(4):100052. Epub 2020/08/25. doi: 10.1016/j.xcrm.2020.100052. PubMed  
518 PMID: 32835305; PubMed Central PMCID: PMC7323681.
- 519 20. Bojkova D, Wagner JUG, Shumliakivska M, Aslan GS, Saleem U, Hansen A, et al. SARS-  
520 CoV-2 infects and induces cytotoxic effects in human cardiomyocytes. *Cardiovasc Res.*  
521 2020;116(14):2207-15. Epub 2020/09/24. doi: 10.1093/cvr/cvaa267. PubMed PMID:  
522 32966582; PubMed Central PMCID: PMC7543363.
- 523 21. Perez-Bermejo JA, Kang S, Rockwood SJ, Simoneau CR, Joy DA, Silva AC, et al. SARS-  
524 CoV-2 infection of human iPSC-derived cardiac cells reflects cytopathic features in hearts of  
525 patients with COVID-19. *Sci Transl Med.* 2021;13(590). Epub 2021/03/17. doi:  
526 10.1126/scitranslmed.abf7872. PubMed PMID: 33723017; PubMed Central PMCID:  
527 PMC78128284.
- 528 22. Bailey AL, Dmytrenko O, Greenberg L, Bredemeyer AL, Ma P, Liu J, et al. SARS-CoV-2  
529 Infects Human Engineered Heart Tissues and Models COVID-19 Myocarditis. *JACC Basic*  
530 *Transl Sci.* 2021;6(4):331-45. Epub 2021/03/09. doi: 10.1016/j.jacbts.2021.01.002. PubMed  
531 PMID: 33681537; PubMed Central PMCID: PMC7909907.
- 532 23. Marchiano S, Hsiang T-Y, Higashi T, Khanna A, Reinecke H, Yang X, et al. SARS-CoV-2  
533 infects human pluripotent stem cell-derived cardiomyocytes, impairing electrical and  
534 mechanical function. *bioRxiv.* 2020:2020.08.30.274464. doi: 10.1101/2020.08.30.274464.
- 535 24. Peacock TP, Goldhill DH, Zhou J, Baillon L, Frise R, Swann OC, et al. The furin cleavage  
536 site in the SARS-CoV-2 spike protein is required for transmission in ferrets. *Nat Microbiol.*

- 537 2021;6(7):899-909. Epub 2021/04/29. doi: 10.1038/s41564-021-00908-w. PubMed PMID:  
538 33907312.
- 539 25. Hoffmann M, Kleine-Weber H, Schroeder S, Kruger N, Herrler T, Erichsen S, et al. SARS-  
540 CoV-2 Cell Entry Depends on ACE2 and TMPRSS2 and Is Blocked by a Clinically Proven  
541 Protease Inhibitor. *Cell*. 2020;181(2):271-80 e8. Epub 2020/03/07. doi:  
542 10.1016/j.cell.2020.02.052. PubMed PMID: 32142651; PubMed Central PMCID:  
543 PMC7102627.
- 544 26. Oudit GY, Kassiri Z, Jiang C, Liu PP, Poutanen SM, Penninger JM, et al. SARS-coronavirus  
545 modulation of myocardial ACE2 expression and inflammation in patients with SARS. *Eur J*  
546 *Clin Invest*. 2009;39(7):618-25. Epub 2009/05/21. doi: 10.1111/j.1365-2362.2009.02153.x.  
547 PubMed PMID: 19453650.
- 548 27. Alhogbani T. Acute myocarditis associated with novel Middle east respiratory syndrome  
549 coronavirus. *Ann Saudi Med*. 2016;36(1):78-80. Epub 2016/02/29. doi: 10.5144/0256-  
550 4947.2016.78. PubMed PMID: 26922692; PubMed Central PMCID: PMC6074274.
- 551 28. Yajima T, Knowlton KU. Viral myocarditis: from the perspective of the virus. *Circulation*.  
552 2009;119(19):2615-24. Epub 2009/05/20. doi: 10.1161/CIRCULATIONAHA.108.766022.  
553 PubMed PMID: 19451363.
- 554 29. Tschope C, Ammirati E, Bozkurt B, Caforio ALP, Cooper LT, Felix SB, et al. Myocarditis  
555 and inflammatory cardiomyopathy: current evidence and future directions. *Nat Rev Cardiol*.  
556 2021;18(3):169-93. Epub 2020/10/14. doi: 10.1038/s41569-020-00435-x. PubMed PMID:  
557 33046850; PubMed Central PMCID: PMC7548534.
- 558 30. Cortese M, Lee JY, Cerikan B, Neufeldt CJ, Oorschot VMJ, Kohrer S, et al. Integrative  
559 Imaging Reveals SARS-CoV-2-Induced Reshaping of Subcellular Morphologies. *Cell Host*

- 560 Microbe. 2020;28(6):853-66 e5. Epub 2020/11/28. doi: 10.1016/j.chom.2020.11.003.  
561 PubMed PMID: 33245857; PubMed Central PMCID: PMC7670925.
- 562 31. Snijder EJ, Limpens R, de Wilde AH, de Jong AWM, Zevenhoven-Dobbe JC, Maier HJ, et  
563 al. A unifying structural and functional model of the coronavirus replication organelle:  
564 Tracking down RNA synthesis. PLoS Biol. 2020;18(6):e3000715. Epub 2020/06/09. doi:  
565 10.1371/journal.pbio.3000715. PubMed PMID: 32511245; PubMed Central PMCID:  
566 PMC7302735.
- 567 32. Kim D, Lee JY, Yang JS, Kim JW, Kim VN, Chang H. The Architecture of SARS-CoV-2  
568 Transcriptome. Cell. 2020;181(4):914-21 e10. Epub 2020/04/25. doi:  
569 10.1016/j.cell.2020.04.011. PubMed PMID: 32330414; PubMed Central PMCID:  
570 PMC7179501.
- 571 33. Tian S, Hu W, Niu L, Liu H, Xu H, Xiao SY. Pulmonary Pathology of Early-Phase 2019  
572 Novel Coronavirus (COVID-19) Pneumonia in Two Patients With Lung Cancer. J Thorac  
573 Oncol. 2020;15(5):700-4. Epub 2020/03/03. doi: 10.1016/j.jtho.2020.02.010. PubMed PMID:  
574 32114094; PubMed Central PMCID: PMC7128866.
- 575 34. Xu Z, Shi L, Wang Y, Zhang J, Huang L, Zhang C, et al. Pathological findings of COVID-19  
576 associated with acute respiratory distress syndrome. Lancet Respir Med. 2020;8(4):420-2.  
577 Epub 2020/02/23. doi: 10.1016/S2213-2600(20)30076-X. PubMed PMID: 32085846;  
578 PubMed Central PMCID: PMC7164771.
- 579 35. Bussani R, Schneider E, Zentilin L, Collesi C, Ali H, Braga L, et al. Persistence of viral  
580 RNA, pneumocyte syncytia and thrombosis are hallmarks of advanced COVID-19 pathology.  
581 EBioMedicine. 2020;61:103104. Epub 2020/11/08. doi: 10.1016/j.ebiom.2020.103104.  
582 PubMed PMID: 33158808; PubMed Central PMCID: PMC7677597.

- 583 36. Zhu N, Wang W, Liu Z, Liang C, Wang W, Ye F, et al. Morphogenesis and cytopathic effect  
584 of SARS-CoV-2 infection in human airway epithelial cells. *Nat Commun.* 2020;11(1):3910.  
585 Epub 2020/08/09. doi: 10.1038/s41467-020-17796-z. PubMed PMID: 32764693; PubMed  
586 Central PMCID: PMCPMC7413383.
- 587 37. Buchrieser J, Dufloo J, Hubert M, Monel B, Planas D, Rajah MM, et al. Syncytia formation  
588 by SARS-CoV-2-infected cells. *EMBO J.* 2020;39(23):e106267. Epub 2020/10/15. doi:  
589 10.15252/emboj.2020106267. PubMed PMID: 33051876; PubMed Central PMCID:  
590 PMCPMC7646020.
- 591 38. Hoffmann M, Kleine-Weber H, Pohlmann S. A Multibasic Cleavage Site in the Spike Protein  
592 of SARS-CoV-2 Is Essential for Infection of Human Lung Cells. *Mol Cell.* 2020;78(4):779-  
593 84 e5. Epub 2020/05/05. doi: 10.1016/j.molcel.2020.04.022. PubMed PMID: 32362314;  
594 PubMed Central PMCID: PMCPMC7194065.
- 595 39. Braga L, Ali H, Secco I, Chiavacci E, Neves G, Goldhill D, et al. Drugs that inhibit  
596 TMEM16 proteins block SARS-CoV-2 spike-induced syncytia. *Nature.* 2021. Epub  
597 2021/04/08. doi: 10.1038/s41586-021-03491-6. PubMed PMID: 33827113.
- 598 40. Evans JP, Liu SL. Role of host factors in SARS-CoV-2 entry. *J Biol Chem.*  
599 2021;297(1):100847. Epub 2021/06/01. doi: 10.1016/j.jbc.2021.100847. PubMed PMID:  
600 34058196; PubMed Central PMCID: PMCPMC8160279.
- 601 41. Papa G, Mallery DL, Albecka A, Welch LG, Cattin-Ortola J, Luptak J, et al. Furin cleavage  
602 of SARS-CoV-2 Spike promotes but is not essential for infection and cell-cell fusion. *PLoS*  
603 *Pathog.* 2021;17(1):e1009246. Epub 2021/01/26. doi: 10.1371/journal.ppat.1009246.  
604 PubMed PMID: 33493182; PubMed Central PMCID: PMCPMC7861537.

- 605 42. Heald-Sargent T, Gallagher T. Ready, set, fuse! The coronavirus spike protein and  
606 acquisition of fusion competence. *Viruses*. 2012;4(4):557-80. Epub 2012/05/17. doi:  
607 10.3390/v4040557. PubMed PMID: 22590686; PubMed Central PMCID:  
608 PMC3347323.
- 609 43. Hale BG. Avoiding culture shock with the SARS-CoV-2 spike protein. *Elife*. 2021;10. Epub  
610 2021/05/19. doi: 10.7554/eLife.69496. PubMed PMID: 34003114; PubMed Central PMCID:  
611 PMC8131097.
- 612 44. Chen S, Zhou Y, Chen Y, Gu J. fastp: an ultra-fast all-in-one FASTQ preprocessor.  
613 *Bioinformatics*. 2018;34(17):i884-i90. Epub 2018/11/14. doi: 10.1093/bioinformatics/bty560.  
614 PubMed PMID: 30423086; PubMed Central PMCID: PMC6129281.
- 615 45. Dobin A, Davis CA, Schlesinger F, Drenkow J, Zaleski C, Jha S, et al. STAR: ultrafast  
616 universal RNA-seq aligner. *Bioinformatics*. 2013;29(1):15-21. Epub 2012/10/30. doi:  
617 10.1093/bioinformatics/bts635. PubMed PMID: 23104886; PubMed Central PMCID:  
618 PMC3530905.
- 619 46. Anders S, Pyl PT, Huber W. HTSeq--a Python framework to work with high-throughput  
620 sequencing data. *Bioinformatics*. 2015;31(2):166-9. Epub 2014/09/28. doi:  
621 10.1093/bioinformatics/btu638. PubMed PMID: 25260700; PubMed Central PMCID:  
622 PMC4287950.
- 623 47. Robinson MD, Oshlack A. A scaling normalization method for differential expression  
624 analysis of RNA-seq data. *Genome Biol*. 2010;11(3):R25. Epub 2010/03/04. doi:  
625 10.1186/gb-2010-11-3-r25. PubMed PMID: 20196867; PubMed Central PMCID:  
626 PMC2864565.

- 627 48. Ritchie ME, Phipson B, Wu D, Hu Y, Law CW, Shi W, et al. limma powers differential  
628 expression analyses for RNA-sequencing and microarray studies. *Nucleic Acids Res.*  
629 2015;43(7):e47. Epub 2015/01/22. doi: 10.1093/nar/gkv007. PubMed PMID: 25605792;  
630 PubMed Central PMCID: PMC4402510.
- 631 49. Li H, Handsaker B, Wysoker A, Fennell T, Ruan J, Homer N, et al. The Sequence  
632 Alignment/Map format and SAMtools. *Bioinformatics.* 2009;25(16):2078-9. Epub  
633 2009/06/10. doi: 10.1093/bioinformatics/btp352. PubMed PMID: 19505943; PubMed  
634 Central PMCID: PMC2723002.
- 635 50. McDowell EM, Trump BF. Histologic fixatives suitable for diagnostic light and electron  
636 microscopy. *Arch Pathol Lab Med.* 1976;100(8):405-14. Epub 1976/08/01. PubMed PMID:  
637 60092.
- 638 51. Ono N, Tatsuo H, Hidaka Y, Aoki T, Minagawa H, Yanagi Y. Measles viruses on throat  
639 swabs from measles patients use signaling lymphocytic activation molecule (CDw150) but  
640 not CD46 as a cellular receptor. *J Virol.* 2001;75(9):4399-401. Epub 2001/04/05. doi:  
641 10.1128/JVI.75.9.4399-4401.2001. PubMed PMID: 11287589; PubMed Central PMCID:  
642 PMC114185.
- 643 52. Cathomen T, Buchholz CJ, Spielhofer P, Cattaneo R. Preferential initiation at the second  
644 AUG of the measles virus F mRNA: a role for the long untranslated region. *Virology.*  
645 1995;214(2):628-32. Epub 1995/12/20. doi: 10.1006/viro.1995.0075. PubMed PMID:  
646 8553566.
- 647 53. Cantuti-Castelvetri L, Ojha R, Pedro LD, Djannatian M, Franz J, Kuivanen S, et al.  
648 Neuropilin-1 facilitates SARS-CoV-2 cell entry and infectivity. *Science.*

649 2020;370(6518):856-60. Epub 2020/10/22. doi: 10.1126/science.abd2985. PubMed PMID:  
650 33082293; PubMed Central PMCID: PMC7857391.

651 54. Daly JL, Simonetti B, Klein K, Chen KE, Williamson MK, Anton-Plagaro C, et al.  
652 Neuropilin-1 is a host factor for SARS-CoV-2 infection. *Science*. 2020;370(6518):861-5.  
653 Epub 2020/10/22. doi: 10.1126/science.abd3072. PubMed PMID: 33082294.

654

655



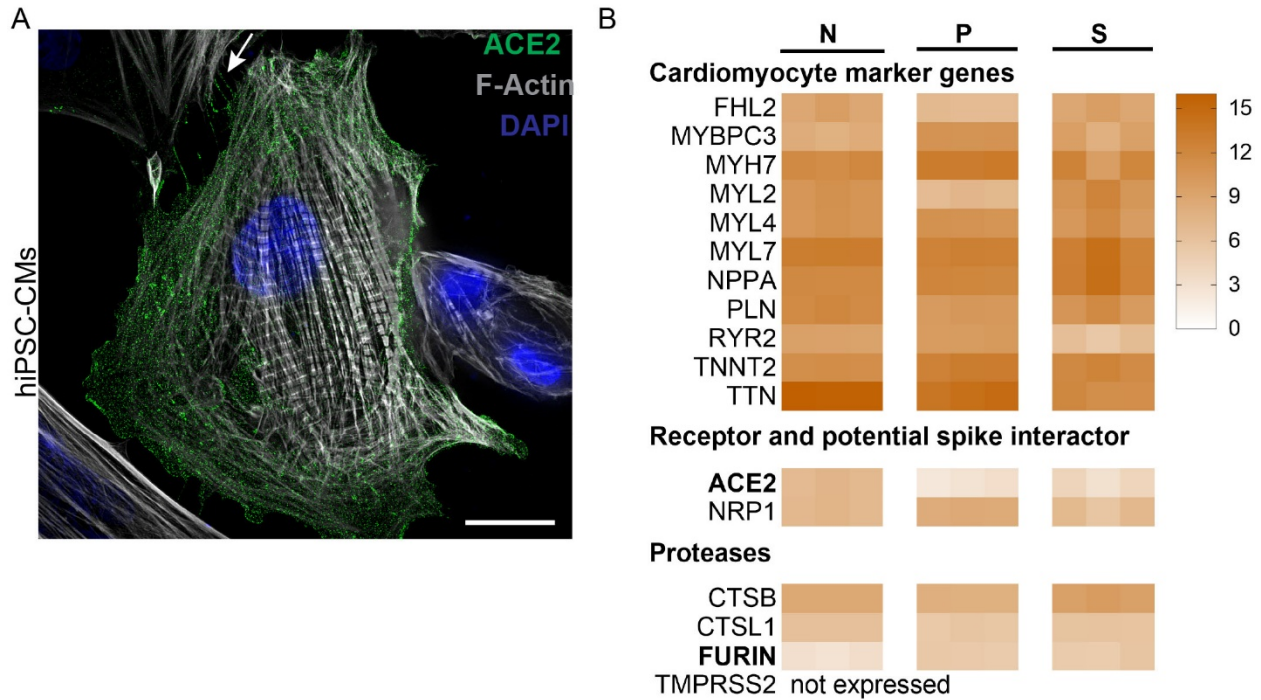

656

657 **Fig. 1: hiPSC-CMs express virus entry factors.** (A) IF super resolution confocal microscopy  
 658 analysis of ACE2 and F-actin expression in hiPSC-CMs. Scale bar, 10  $\mu$ m. (B) Transcript levels of  
 659 cardiomyocytes marker genes and of virus entry factors. Scale on the right: log<sub>2</sub> trimmed mean  
 660 of M values (TMM) normalized sequence read counts. N=this study; P=Perez-Bermejo et al.,  
 661 2021 [21]; S=Sharma et al., 2020 [19]. Gene abbreviations: FHL2=four and a half LIM domains 2;  
 662 MYBPC3=myosin binding protein C; MYH=myosin, heavy chain; MYL= myosin, light chain;  
 663 NPPA=natriuretic peptide A; PLN=phospholamban; RYR2=ryanodine receptor 2;  
 664 TNNT2=troponin T type 2; TTN=titin; ACE2=angiotensin I converting enzyme; NRP1=neuropilin  
 665 1, a potential spike interactor [53, 54]; CTSB=cathepsin B; CTSL1=cathepsin L1; TMPRSS2=  
 666 transmembrane serine protease 2.

667

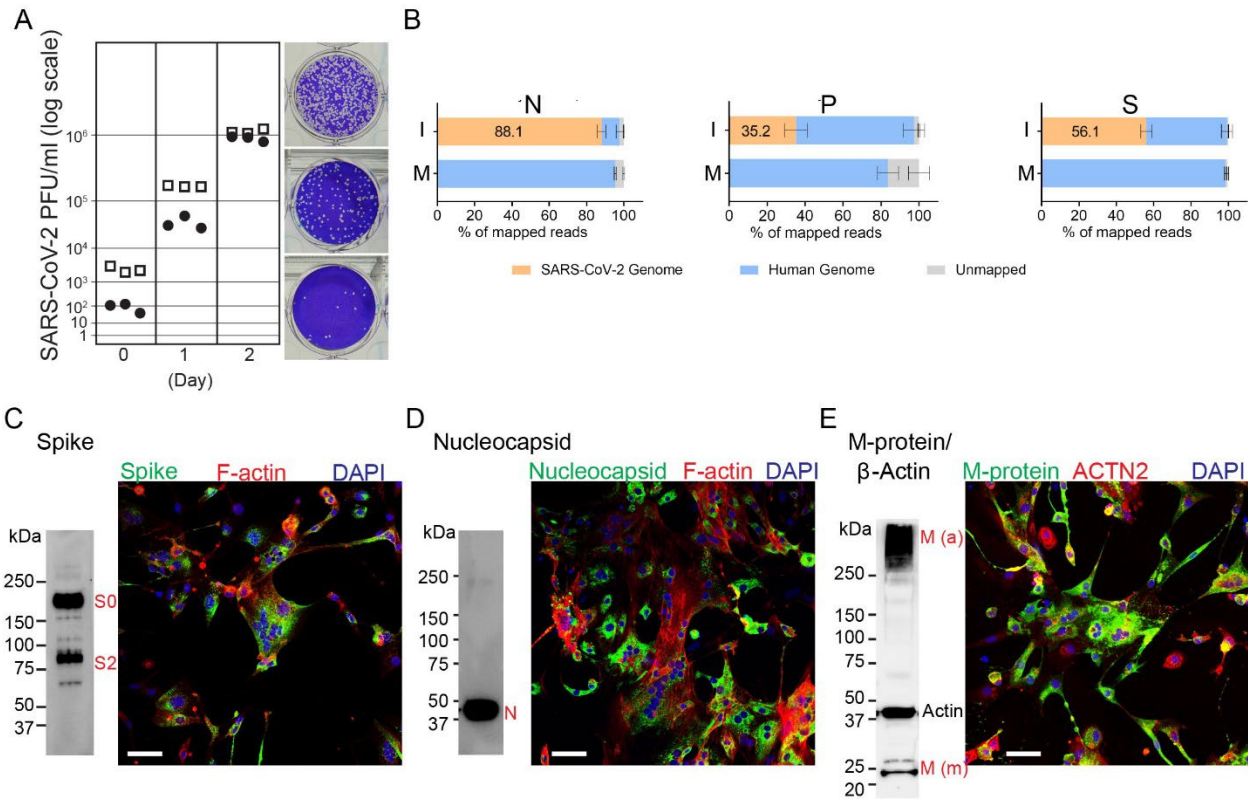

668  
669

670 **Fig. 2: Efficient SARS-CoV-2 infection of hiPSC-CMs.** (A) SARS-CoV-2 titers in two hiPSC-CM cell  
 671 lines: open squares, hiPSC-CM#1; filled dots, hiPSC-CM#2, each data point represents one  
 672 biological replicate. (B) Quantification of viral transcripts in infected hiPSC-CMs from this study  
 673 (N) and two published studies: P=Perez-Bermejo et al., 2021 [21]; S=Sharma et al., 2020 [19].  
 674 I=infected cardiomyocytes; M=mock infected cardiomyocytes. (C-E) Companion immunoblots  
 675 (left) and low-power IF confocal microscopy (right) of (C) SARS-CoV-2 spike glycoprotein (S0,  
 676 S2), (D) nucleocapsid, (N) and (E) membrane (M) protein, monomer (m) and insoluble aggregate  
 677 (a) in hiPSC-CMs, 48 hours post-infection. Scale bar, 50  $\mu$ m.

678

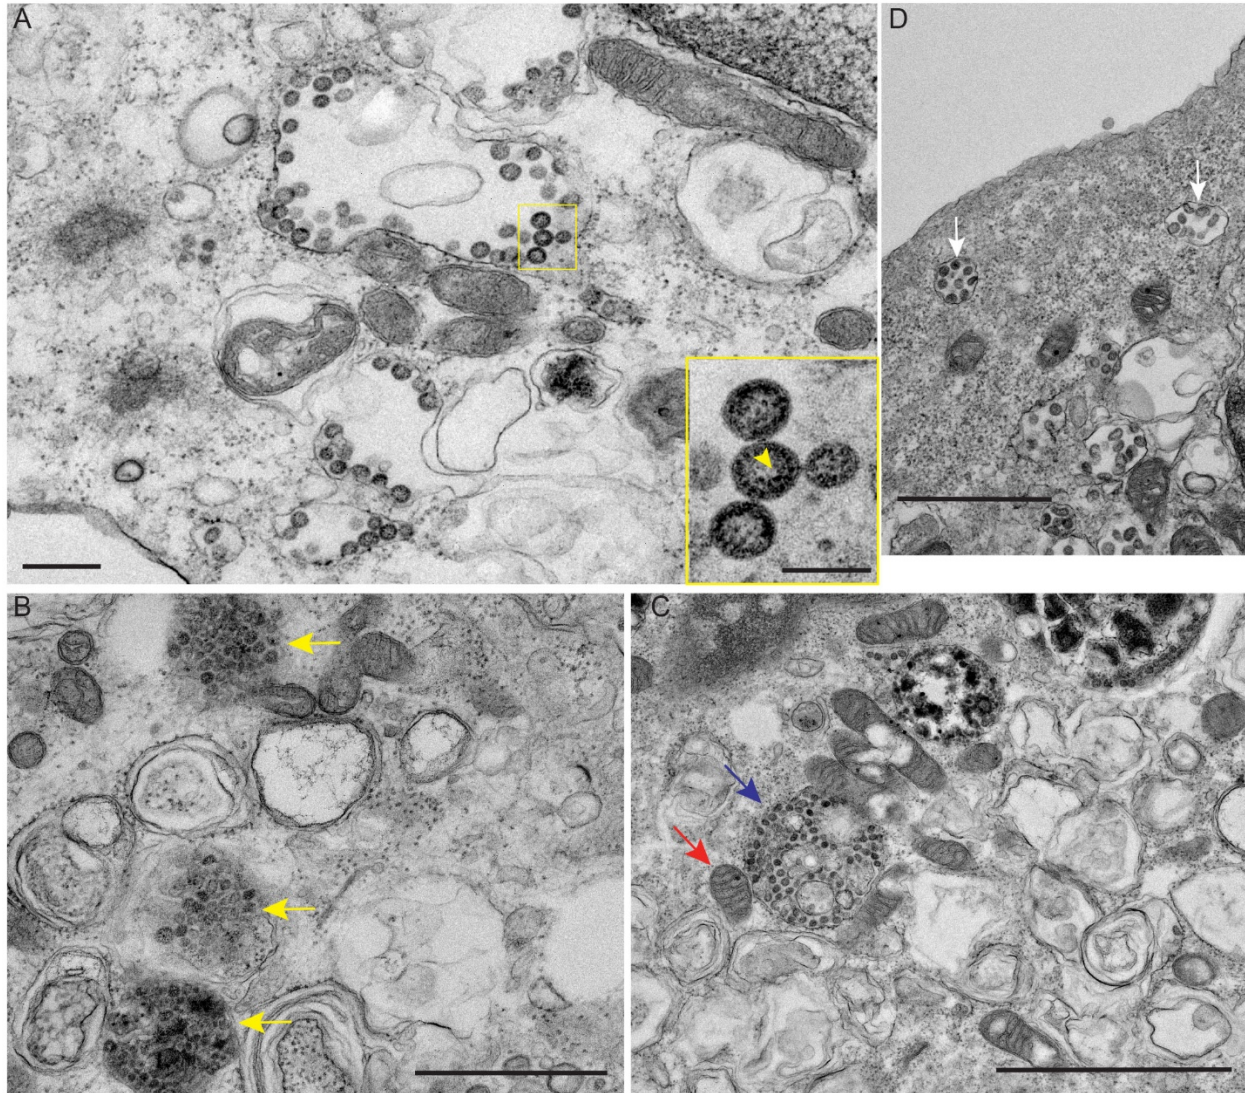

679  
680

681 **Fig. 3: Maturation of SARS-CoV-2 in hiPSC-CMs.** (A) TEM of SARS-CoV-2 infected hiPSC-CMs, 48  
682 hours post-inoculation revealing numerous SARS-CoV-2 particles concentrated within vesicles  
683 (yellow box). Scale bar, 400 nm. Inset panel is high magnification of the viral particles,  
684 demonstrating electron-dense ribonucleocapsid structures (yellow arrow). Scale bar, 100 nm.  
685 (B) SARS-CoV-2 clustered membranes (yellow arrows). Scale bar, 1  $\mu$ m. (C) SARS-CoV-2 vesicle  
686 packet (blue arrow); mitochondria (red arrow). Scale bar, 2  $\mu$ m. (D) SARS-CoV-2 exocytic  
687 vesicles (white arrows). Scale bar, 1  $\mu$ m.

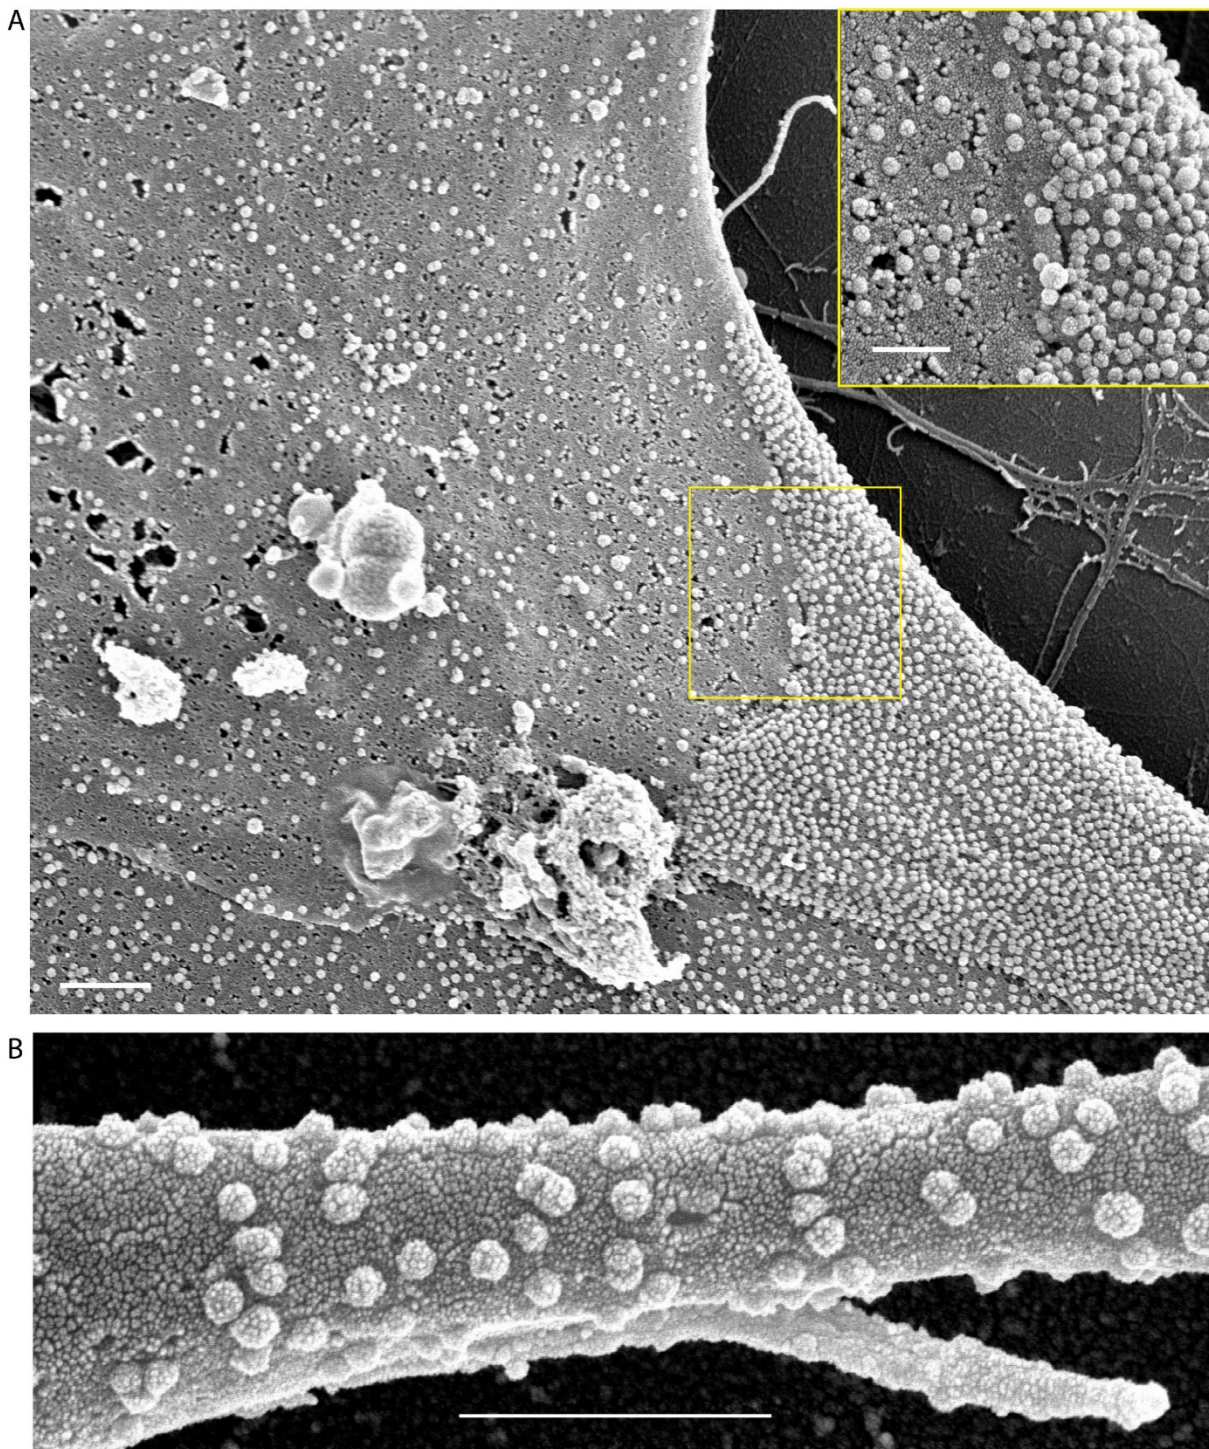

688  
689 **Fig. 4: Surface of hiPSC-CMs infected with SARS-CoV-2.** (A) Scale bar, 1 μm. Inset shows high  
690 magnification of the surface region within the yellow box. Scale bar, 500 nm. (B) High  
691 magnification SEM of hiPSC-CM filopodia dotted with SARS-CoV-2 viral particles. Scale bar, 1  
692 μm.

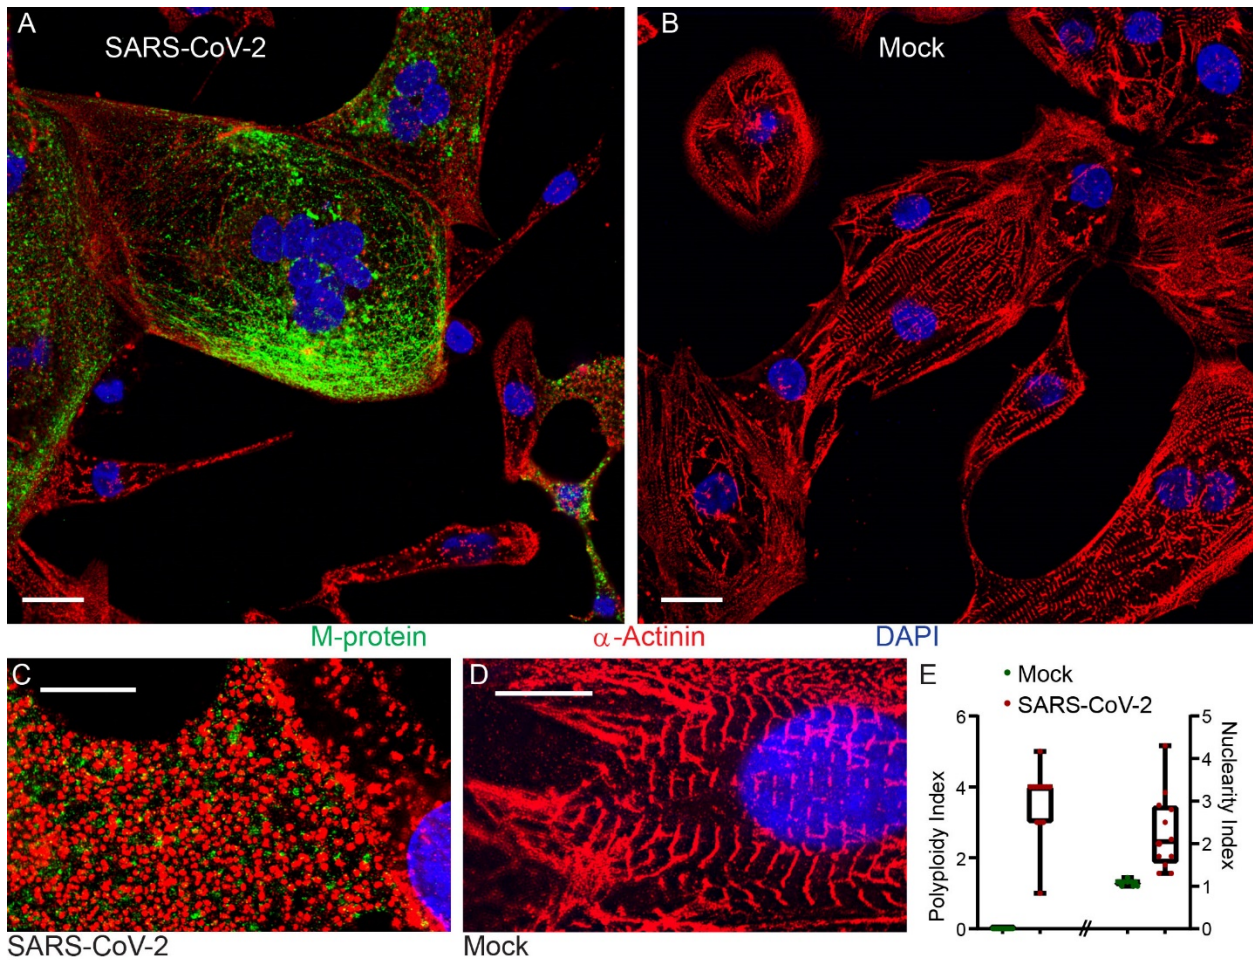

693  
694  
695

**Fig. 5: Cytopathic effects of SARS-CoV-2 in hiPSC-CMs. (A-B)** IF confocal microscopy of SARS-

696 CoV-2 infected (48 hours post-infection) or mock-infected hiPSC-CMs, respectively. Scale bar,  
697 20  $\mu$ m. (C-D) IF super resolution confocal microscopy of infected and mock-infected hiPSC-CMs,  
698 respectively. Scale bars, 10  $\mu$ m. (E) Quantification of cell fusion in SARS-CoV-2 infected and  
699 mock infected hiPSC-CMs 48 hours post-inoculation. Polyploidy index is the average number of  
700 syncytia per field (n= 3 biological replicates). Nuclearity index is the average number of nuclei  
701 per cell per field (n= 3 biological replicates, p = 0.0002, two-tailed t-test). Box and whisker plots  
702 show median, upper and lower quartile, and extremes. Each data point represents one image  
703 field containing about 30 cells. Twelve image fields were counted per condition.

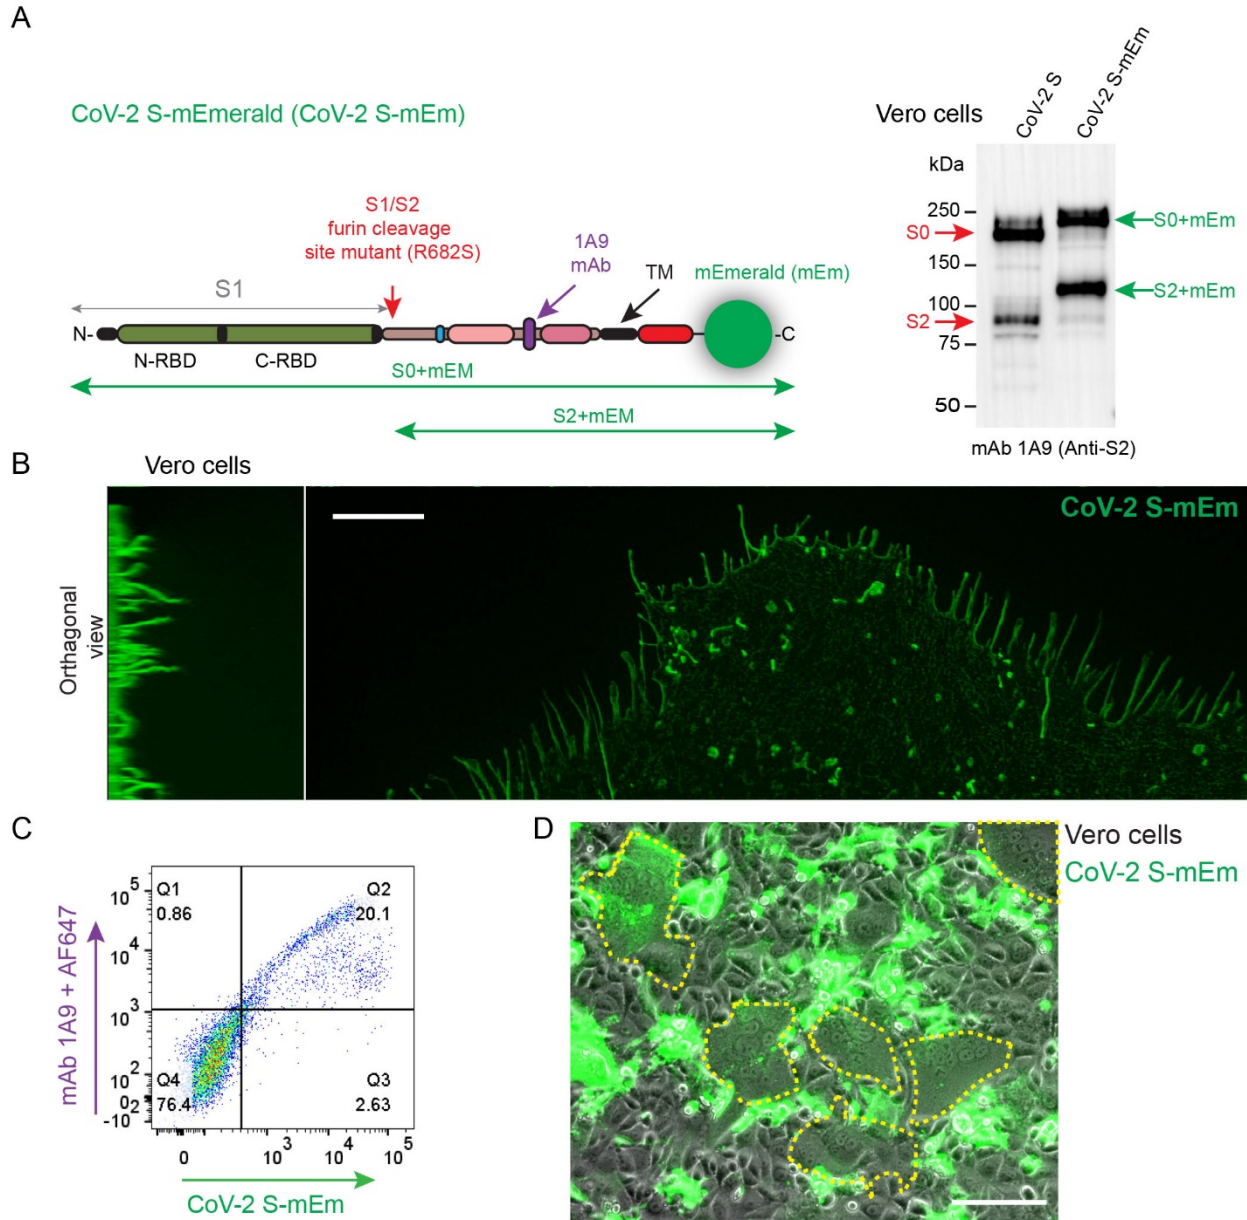

704  
 705  
 706 **Fig. 6: Expression and function of SARS CoV-2 spike protein tagged with mEmerald.** (A) Left  
 707 panel: schematic of SARS-CoV-2 S tagged with mEmerald (mEm) at the cytoplasmic tail.  
 708 Cleavage at the S1/S2 furin site primes the spike protein for activation. S1, S1 subunit; S2, S2  
 709 subunit; N-/C-RBD, N-/C-terminal receptor binding domains; TM, trans-membrane segment.  
 710 The fusion peptide is shown in blue and heptad repeat 1 and 2 in magenta and dark magenta,  
 711 respectively. The location of the furin cleavage mutant, R682S is indicated. The monoclonal

712 antibody 1A9, which was used to detect the spike proteins, binds to an exposed loop (purple)  
713 located close to heptad repeat 2. Right panel: immunoblot of the CoV-2 S and CoV-2 S-mEm  
714 proteins detecting their S0 and S2 subunits. **(B)** Super resolution confocal microscopy of CoV-2  
715 S-mEM localization to Vero cell filopodia. Scale bar, 5  $\mu\text{m}$ . **(C)** Cellular localization of the tagged  
716 spike protein in non-permeabilized HeLa cells transfected with the expression plasmid for S-  
717 mEm. This protein was detected either by fluorescence emission (horizontal axis) or by using  
718 spike-specific-mAb 1A9 and AF647 conjugated secondary-antibody (vertical axis). **(D)** Syncytia in  
719 Vero cells transfected with CoV-2 S-mEm are indicated by a dotted yellow line. Scale bar, 50  
720  $\mu\text{m}$ .

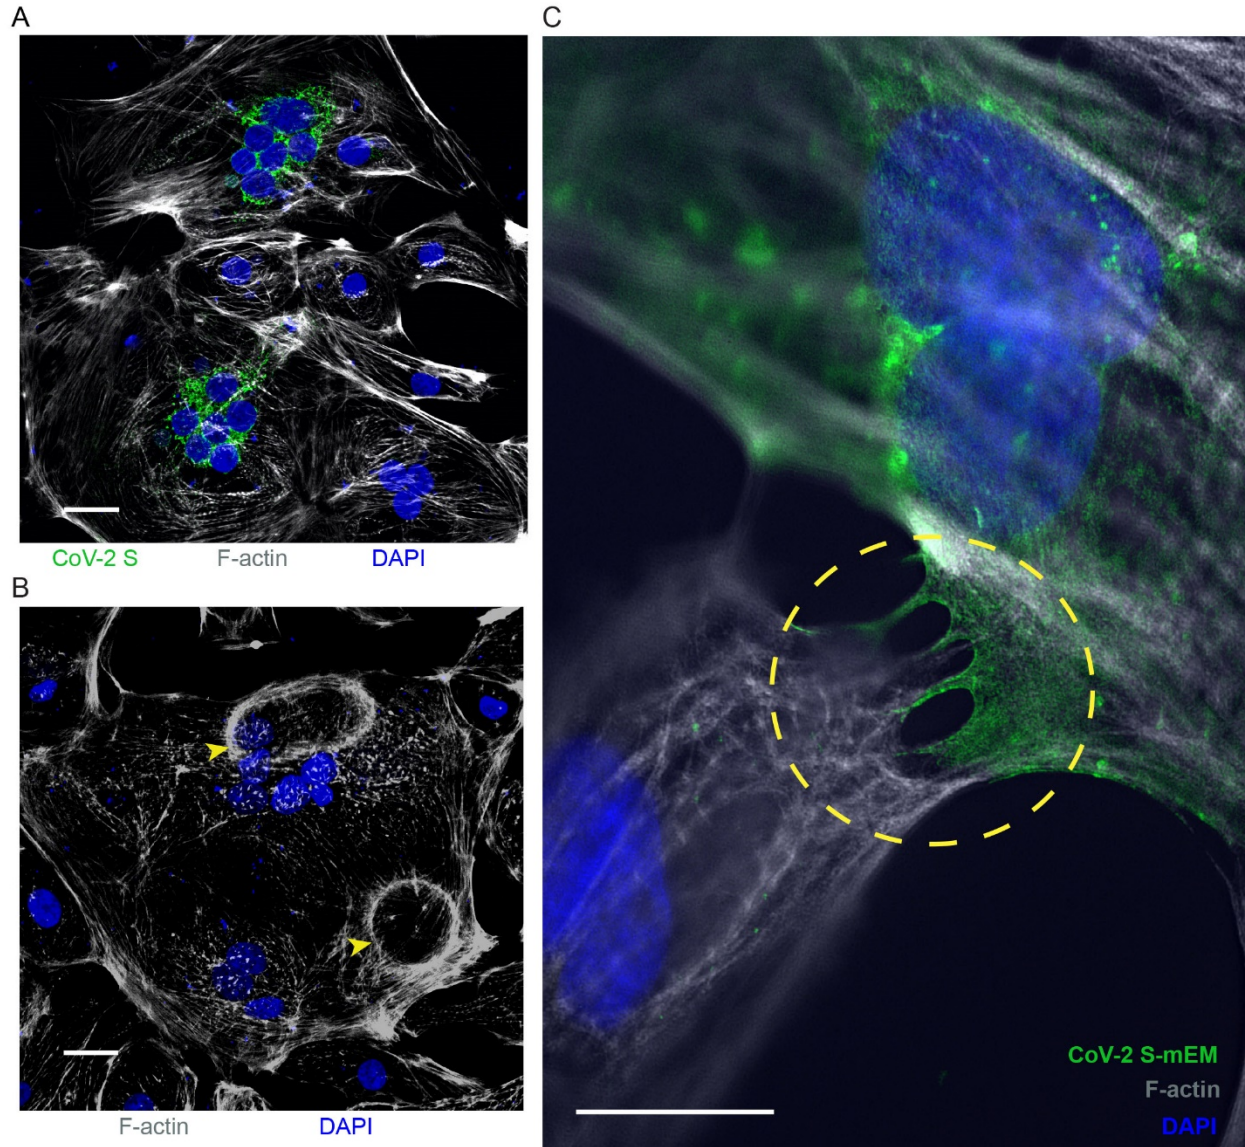

721  
722

723

724

725

726

727

728

729

**Fig. 7: SARS-CoV-2 spike protein induces syncytia in hiPSC-CMs. (A)** IF confocal microscopy of SARS-CoV-2 spike (CoV-2 S)-expressing hiPSC-CMs. Scale bar, 50 μm. Viral and cellular components visualized are indicated with their corresponding color below each panel. **(B)** IF confocal microscopy of CoV-2 S-expressing hiPSC-CM with enucleated actin cytoskeletal “corpses” (yellow arrows). **(C)** Super resolution confocal microscopy of CoV-2 S-mEM localization to hiPSC-CM filopodia directly contacting the sarcolemma of an adjacent hiPSC-CM (yellow circle). Scale bar, 2 μm.



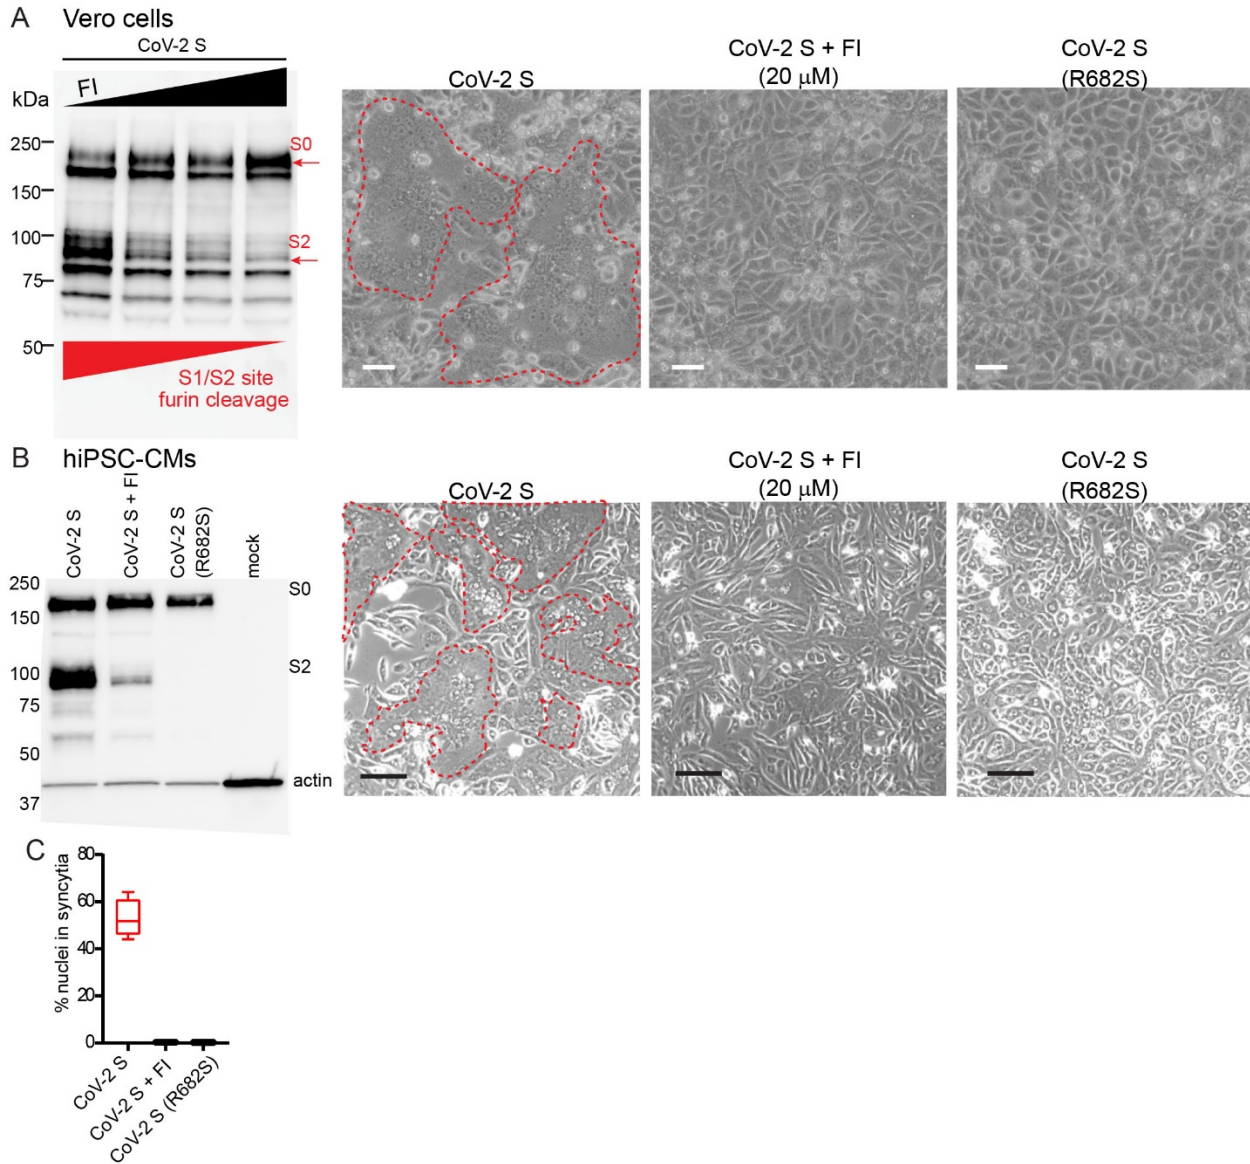

730

731

732 **Fig. 8: SARS-CoV-2 spike generated syncytia are blocked by a furin inhibitor or a furin-**

733 **cleavage mutant. (A)** (left panel) immunoblot analysis of CoV-2 S protein processing (S0

734 cleavage into S1 and S2) in Vero cells treated with increasing concentrations of FI (0  $\mu$ M, 5  $\mu$ M,

735 10  $\mu$ M and 20  $\mu$ M); cell lysates were separated by 4-15% SDS-PAGE under reducing conditions.

736 (2<sup>nd</sup> to 4<sup>th</sup> panels) phase contrast images of Vero cells expressing CoV-2 S in the absence or

737 presence of 20  $\mu$ M FI, or of Vero cells expressing the R682S cleavage mutant, respectively, 72-

738 hours after transfection. Syncytia are demarcated by a dashed broken red line. Scale bar,

739 100 $\mu$ m. **(B)** (left panel) gel analysis of CoV-2 S protein processing in the absence or presence of  
740 FI (20  $\mu$ M), and of the processing of the CoV-2 S R682s furin cleavage mutant (R682S). Lysates  
741 of hiPSC-CM were separated by 4-15% SDS-PAGE under reducing conditions. (2<sup>nd</sup> to 4<sup>th</sup> panels)  
742 phase contrast images of hiPSC-CM expressing CoV-2 S in the absence or presence of 20  $\mu$ M FI,  
743 or of Vero cells expressing the R682S cleavage mutant, respectively, 72-hours after  
744 transfection. Syncytia are demarcated by a dashed broken red line. Scale bar, 100 $\mu$ m. **(C)**  
745 Quantification of hiPSC-CM fusion. % nuclei in syncytia denotes the percent of total nuclei  
746 within syncytia 48 hr post transfection (n= 3 biological replicates, p <0.0001, ANOVA). Box and  
747 whisker plots for all quantification in this figure shows median, upper and lower quartile, and  
748 extremes.

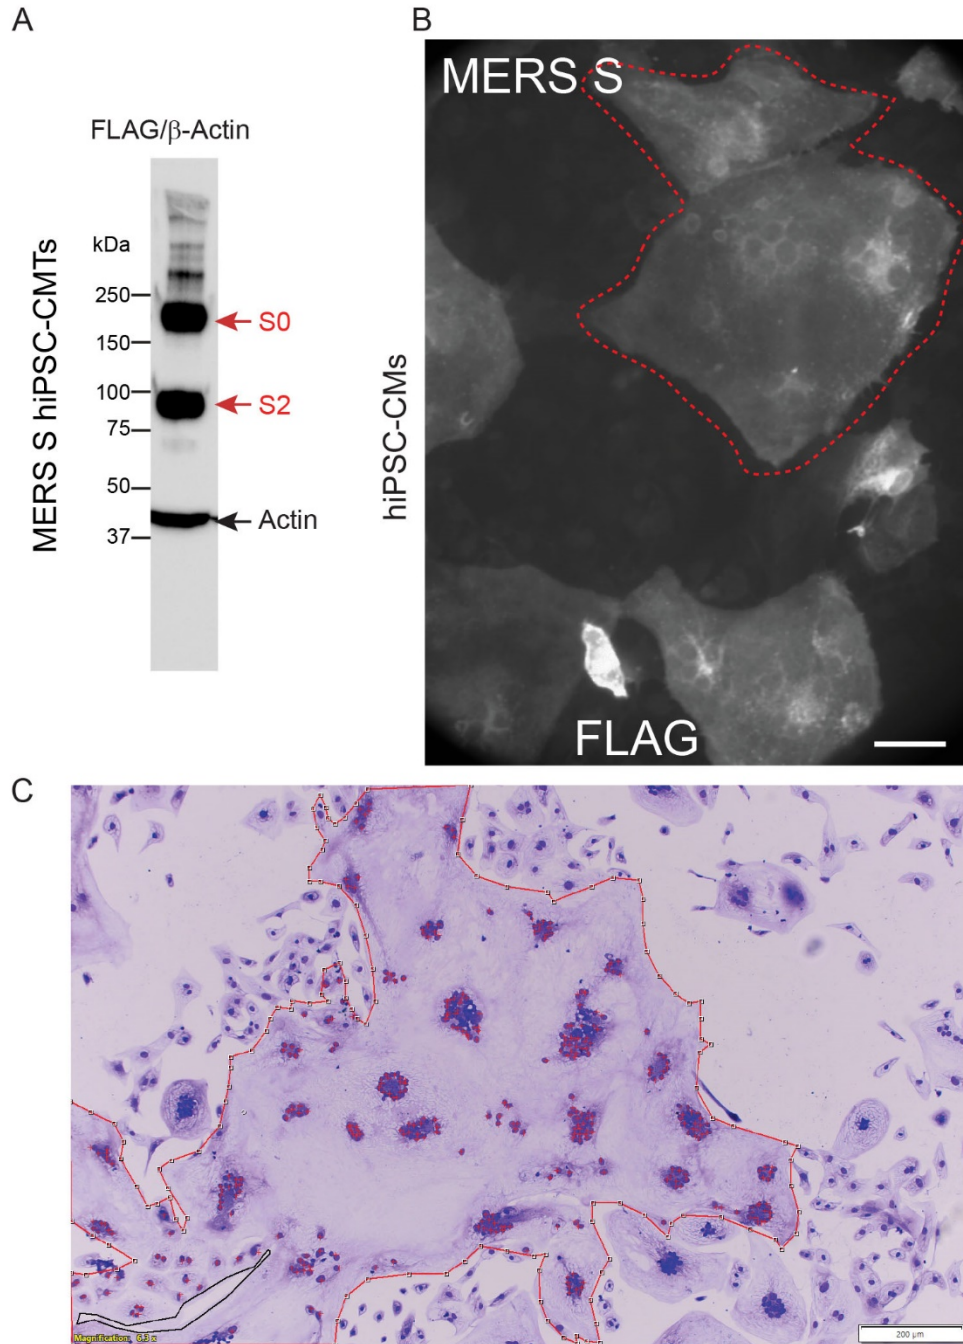

749

750

751

752

753

754

**Fig. 9: MERS spike-mediated syncytia.** (A) Immunoblot of hiPSC-CM expressing recombinant MERS spike protein showing processing. The MERS spike S0 precursor and S2 cleaved subunit are detected through a FLAG epitope fused to the C-terminus. High molecular weight (>250 kDa) oligomers, including trimers, are detected. (B) Anti-FLAG IF microscopy of MERS spike

755 protein-mediated hiPSC syncytia, largest example circled in red. Scale bar, 50  $\mu\text{m}$ . **(C)** Bright  
756 field microscopy of crystal violet-stained hiPSC-CM expressing recombinant MERS spike protein  
757 at 5 days post-transfection. A composite syncytium is circled in red. Scale bar, 200  $\mu\text{m}$ .  
758

## 759 Supporting information

760 **S1 Table.** Affymetrix microarray analyses of ACE2 and TMPRSS2 expression in H9 human  
761 embryonic stem cells.

762 **S2 Movie.** Intercellular spread of CoV-2 S-mEm spike protein and development of Vero cell  
763 syncytia.

764 **S3 Movie.** Intercellular spread of CoV-2 S-mEm spike protein and development of hiPSC-CM  
765 syncytia.

766 **S1 Table.** ACE2 and TMPRSS2 expression in H9 human embryonic stem cells.

| Probe set                    | Day 0               | Day 8     | Day 20    | Day 50    |
|------------------------------|---------------------|-----------|-----------|-----------|
| <i>ACE2</i><br>219962_at     | 11.83 P**           | 4.53 P    | 462.73 P  | 82.48 P   |
| <i>ACE2</i><br>222257_s_at   | 6.61 A <sup>§</sup> | 16.74 P   | 672.49 P  | 119.02 P  |
| <i>TMPRSS2</i><br>1570433_at | 9.75 A              | 15.73 A   | 11.82 A   | 17.11 A   |
| <i>TMPRSS2</i><br>205102_at  | 79.07 A             | 47.56 A   | 104.44 A  | 80.07 A   |
| <i>CTSB</i><br>213275_x_at   | 355.25 P            | 1330.85 P | 1841.63 P | 1599.04 P |

767  
768 \* Affymetrix microarray numerical values across an individual probe set

769 + P (present): transcript is significantly (P <0.05) expressed compared with perfectly matched  
770 and mismatched (background) probe sets

771 <sup>§</sup>A (absent): transcript is not significantly (P >0.05) expressed

772

773
